# Supplementary material
Source: Royal Society of Chemistry journal article supplement (doi:10.1039/d5mr00156k)
Supplement: d5mr00156k1.pdf [file d5mr00156k1.pdf]

## Supporting Information for:

# Synthesis of Organic HCl Salts via Mechanochemical Salification and their Characterization with $^{35/37}\text{Cl}$ Solid-State NMR Spectroscopy

Zachary T. Dowdell<sup>1,2</sup>, Peyton G. Osborn<sup>1,2</sup>, Victoria K. Rash<sup>3</sup>, Trisha S. Patel<sup>1</sup>, Alexander M. Perez<sup>1</sup>, Xinsong Lin<sup>1</sup>,  
Sean T. Holmes<sup>1,2,\*</sup>, and Robert. W. Schurko<sup>1,2,†</sup>

<sup>1</sup> Department of Chemistry and Biochemistry, Florida State University, Tallahassee, FL, 32306.

<sup>2</sup> National High Magnetic Field Laboratory, Tallahassee, FL 32310

<sup>3</sup> Department of Physics, University of Texas, Dallas, TX, 75080

†Deceased February 2026

\*Author to whom correspondence should be addressed.

E-mail: [sholmes2@fsu.edu](mailto:sholmes2@fsu.edu)

## Contents

|                                                                                                                                                                                          |    |
|------------------------------------------------------------------------------------------------------------------------------------------------------------------------------------------|----|
| <b>Table S1.</b> $^{35}\text{Cl}$ SSNMR acquisition parameters at 18.8 T.....                                                                                                            | 4  |
| <b>Table S2.</b> $^{37}\text{Cl}$ SSNMR acquisition parameters at 18.8 T.....                                                                                                            | 5  |
| <b>Table S3.</b> $\text{p}K_{\text{a}}$ values of various molecules.....                                                                                                                 | 6  |
| <b>Table S4.</b> Enthalpies of formation for the materials with known crystal structures.....                                                                                            | 7  |
| <b>Fig. S1.</b> Experimental and simulated PXRD patterns of nicotinamide, <b>NicH</b> , and <b>NicH-Nic:H<sub>2</sub>O</b> .....                                                         | 8  |
| <b>Fig. S2.</b> Experimental and simulated PXRD patterns of isonicotinamide, <b>IsoH</b> and <b>IsoH-Iso:H<sub>2</sub>O</b> .....                                                        | 9  |
| <b>Fig. S3.</b> Experimental and simulated PXRD patterns of picolinamide, <b>PicH:H<sub>2</sub>O</b> , <b>PicH-Pic:H<sub>2</sub>O</b> , and <b>PicH</b> .....                            | 10 |
| <b>Fig. S4.</b> Experimental and simulated PXRD patterns of nicotinic acid, isonicotinic acid, <b>NicAH</b> , and <b>IsoAH</b> .....                                                     | 11 |
| <b>Fig. S5.</b> Experimental and simulated PXRD patterns of picolinic acid, <b>PicAH:H<sub>2</sub>O</b> , <b>PicAH</b> and <b>PicAH-PicA:H<sub>2</sub>O</b> .....                        | 12 |
| <b>Fig. S6.</b> Experimental and simulated PXRD patterns of caffeine, <b>CaffH:H<sub>2</sub>O</b> , and <b>CaffH</b> .....                                                               | 13 |
| <b>Fig. S7.</b> Experimental and simulated PXRD patterns of acetaminophen, <b>AcetH-Acet</b> , <b>AcetH:H<sub>2</sub>O</b> , <b>AcetH-Acet:H<sub>2</sub>O</b> .....                      | 14 |
| <b>Fig. S8.</b> PXRD patterns of <b>NicA</b> , <b>NicH</b> , and <b>NicH-Nic:H<sub>2</sub>O</b> and competitive milling reactions between <b>Nic</b> and <b>NicA</b> .....               | 15 |
| <b>Fig. S9.</b> PXRD patterns of <b>IsoA</b> , <b>IsoH</b> , and <b>IsoH-Iso:H<sub>2</sub>O</b> and competitive milling reactions between <b>Iso</b> and <b>IsoA</b> .....               | 16 |
| <b>Fig. S10.</b> PXRD patterns of <b>Pic</b> , <b>PicA</b> , <b>Pic-PicA</b> , <b>PicAH-PicA</b> and competitive milling reactions between <b>Pic</b> and <b>PicA</b> .....              | 17 |
| <b>Fig. S11.</b> PXRD patterns of <b>Nic</b> , <b>Iso</b> , <b>Nic-Iso</b> , <b>IsoH-Iso:H<sub>2</sub>O</b> and competitive milling reactions between <b>Nic</b> and <b>Iso</b> .....    | 18 |
| <b>Fig. S12.</b> PXRD patterns of <b>Nic</b> , <b>Pic</b> , <b>NicH-Nic:H<sub>2</sub>O</b> , <b>Nic-Pic</b> , and competitive milling reactions between <b>Nic</b> and <b>Pic</b> .....  | 19 |
| <b>Fig. S13.</b> PXRD patterns of <b>Iso</b> , <b>Pic</b> , <b>Iso-Pic</b> , and competitive milling reactions between <b>Iso</b> and <b>Pic</b> .....                                   | 20 |
| <b>Fig. S14.</b> PXRD patterns of <b>IsoA</b> , <b>NicAH</b> , <b>IsoAH</b> , and competitive milling reactions between <b>IsoA</b> and <b>NicA</b> .....                                | 21 |
| <b>Fig. S15.</b> PXRD patterns of <b>IsoA</b> , <b>NicA</b> , <b>NicAH</b> , and competitive milling reactions between <b>IsoA</b> and <b>NicA</b> .....                                 | 22 |
| <b>Fig. S16.</b> PXRD patterns of <b>NicA</b> , <b>PicA</b> , <b>NicAH</b> , <b>PicAH:H<sub>2</sub>O</b> and competitive milling reactions between <b>PicA</b> and <b>NicA</b> .....     | 23 |
| <b>Fig. S17.</b> PXRD patterns of <b>NicA</b> , <b>PicA</b> , <b>PicAH:H<sub>2</sub>O</b> , <b>PicAH-Pic</b> and competitive milling reactions between <b>PicA</b> and <b>NicA</b> ..... | 24 |

|                                                                                                                                                                                                                                                                                                                                                                                               |    |
|-----------------------------------------------------------------------------------------------------------------------------------------------------------------------------------------------------------------------------------------------------------------------------------------------------------------------------------------------------------------------------------------------|----|
| <b>Fig. S18.</b> PXRD patterns of <b>IsoA</b> , <b>PicA</b> , <b>PicAH:H<sub>2</sub>O</b> , <b>PicAH-Pic</b> and competitive milling reactions between <b>PicA</b> and <b>IsoA</b> .....                                                                                                                                                                                                      | 25 |
| <b>Fig. S19.</b> <sup>35</sup> Cl static SSNMR of <b>IsoH</b> , <b>IsoH-Iso:H<sub>2</sub>O</b> , <b>PicH</b> , <b>PicH-Pic</b> , and <b>Iso-Pic:HCl</b> .....                                                                                                                                                                                                                                 | 26 |
| <b>Fig. S20.</b> PXRD patterns of <b>AcetH-Acet:H<sub>2</sub>O</b> , <b>Acet</b> , and <b>Acet</b> milled with ½ equivalent of HCl(aq). .....                                                                                                                                                                                                                                                 | 27 |
| <b>Fig. S21.</b> PXRD patterns of scaled up reactions (red) compared to simulated patterns of various HCl salts (blue). .....                                                                                                                                                                                                                                                                 | 28 |
| <b>Table S6.</b> Summary of results from SCXRD analysis of <b>PicH:H<sub>2</sub>O</b> . .....                                                                                                                                                                                                                                                                                                 | 29 |
| <b>Fig. S22.</b> TGA of <b>IsoH-Iso:H<sub>2</sub>O</b> from 25 to 300 °C. ....                                                                                                                                                                                                                                                                                                                | 30 |
| <b>Fig. S23.</b> TGA of <b>PicH-Pic</b> from 30 to 200 °C.....                                                                                                                                                                                                                                                                                                                                | 30 |
| <b>Fig. S24.</b> TGA of <b>PicAH-PicA</b> from 30 to 200 °C.....                                                                                                                                                                                                                                                                                                                              | 31 |
| <b>Fig. S25.</b> TGA of <b>AcetH:Acet:H<sub>2</sub>O</b> from 50 to 300 °C.....                                                                                                                                                                                                                                                                                                               | 31 |
| <b>Fig. S26.</b> Relationships between principal components of the <sup>35</sup> Cl EFG tensors were measured experimentally and calculated from DFT-D2* geometry optimized structures. The blue line represents the linear regression fit, while the grey line represents perfect correlation. ....                                                                                          | 32 |
| <b>Supplement S1</b> .....                                                                                                                                                                                                                                                                                                                                                                    | 33 |
| <b>Fig. S27.</b> Comparison of <sup>35</sup> Cl SSNMR spectra acquired at 18.8 T under ambient conditions and at 245 K for <b>CaffH:H<sub>2</sub>O</b> and <b>AcetH-Acet</b> . At For <b>CaffH:H<sub>2</sub>O</b> at 245 K: $C_Q = 5.6$ MHz, $\eta_Q = 0.16$ , $\delta_{iso} = 11.1$ ppm. For <b>AcetH-Acet</b> at 245 K: $C_Q = 3.51$ MHz, $\eta_Q = 0.17$ , $\delta_{iso} = 77.2$ ppm. .... | 34 |

**Table S1.**  $^{35}\text{Cl}$  SSNMR acquisition parameters at 18.8 T.

| Material                    | Static/MAS<br>( $\nu_{\text{rot}}$ in kHz) | Pulse<br>Sequence <sup>a</sup> | No.<br>Scans | Experimental<br>Time (hr) | Recycle<br>Delay (s) | Echo Length<br>( $\mu\text{s}$ ) <sup>b</sup> | Echoes | Dwell<br>Time<br>( $\mu\text{s}$ ) | Spectral<br>Width<br>(kHz) | Time<br>Domain<br>Size | Pulse<br>width<br>[ $\pi/2$ ] ( $\mu\text{s}$ ) |
|-----------------------------|--------------------------------------------|--------------------------------|--------------|---------------------------|----------------------|-----------------------------------------------|--------|------------------------------------|----------------------------|------------------------|-------------------------------------------------|
| NicH-Nic:H <sub>2</sub> O   | Static                                     | QCPMG                          | 6047         | 10.1                      | 6.0                  | 1000                                          | 30     | 2.0                                | 250                        | 17408                  | 2.50                                            |
|                             | MAS (15)                                   | Bloch Decay                    | 256          | 0.4                       | 6.0                  | -                                             | -      | 2.0                                | 250                        | 10240                  | 2.50                                            |
| NicH                        | Static                                     | QCPMG                          | 2048         | 2.8                       | 5.0                  | 750                                           | 35     | 1.0                                | 500                        | 31744                  | 3.57                                            |
|                             | MAS (20)                                   | QCPMG                          | 256          | 0.4                       | 5.0                  | 400                                           | 50     | 2.5                                | 200                        | 10240                  | 12.50                                           |
| IsoH-Iso:H <sub>2</sub> O   | Static                                     | QCPMG                          | 3848         | 4.3                       | 4.0                  | 300                                           | 66     | 1.0                                | 500                        | 30720                  | 2.08                                            |
| IsoH                        | Static                                     | QCPMG                          | 1024         | 1.7                       | 6.0                  | 300                                           | 66     | 2.0                                | 250                        | 14500                  | 5.0                                             |
|                             | MAS (15)                                   | QCPMG                          | 256          | 0.4                       | 6.0                  | 300                                           | 66     | 2.0                                | 250                        | 14336                  | 5.0                                             |
| PicH-Pic                    | Static                                     | Hahn Echo                      | 24280        | 4.5                       | 1.5                  | -                                             | 1      | 5.0                                | 100                        | 1024                   | 25.0                                            |
|                             | MAS (10)                                   | Hahn Echo                      | 32           | 0.01                      | 1.5                  | -                                             | 1      | 5.0                                | 100                        | 2048                   | 25.0                                            |
| PicH:H <sub>2</sub> O       | Static                                     | QCPMG                          | 2048         | 1.7                       | 3.0                  | 500                                           | 70     | 1.0                                | 500                        | 38912                  | 5.0                                             |
|                             | PicH                                       | Static                         | Hahn Echo    | 2560                      | 2.8                  | 4.0                                           | -      | 1                                  | 2.5                        | 200                    | 2048                                            |
| MAS (15)                    |                                            | Bloch Decay                    | 256          | 0.2                       | 3.0                  | -                                             | -      | 20.0                               | 25                         | 4096                   | 12.5                                            |
| NicAH                       | Static                                     | WCPMG                          | 16384        | 11.4                      | 2.5                  | 400                                           | 50     | 0.43                               | 1153.8                     | 65536                  | 5.0                                             |
| IsoAH                       | Static                                     | QCPMG                          | 4096         | 4.6                       | 4.0                  | 500                                           | 60     | 1.0                                | 500                        | 37888                  | 2.5                                             |
| PicAH-PicA                  | Static                                     | QCPMG                          | 20480        | 14.2                      | 2.5                  | 500                                           | 55     | 1.67                               | 300                        | 20480                  | 3.57                                            |
| PicAH:H <sub>2</sub> O      | Static                                     | QCPMG                          | 20480        | 11.4                      | 2.0                  | 300                                           | 66     | 1.67                               | 300                        | 12288                  | 4.17                                            |
|                             | MAS (19)                                   | QCPMG                          | 4096         | 2.3                       | 2.0                  | 300                                           | 40     | 2.0                                | 250                        | 20480                  | 4.17                                            |
| PicAH                       | Static                                     | WCPMG                          | 16384        | 18.2                      | 4.0                  | 300                                           | 75     | 0.67                               | 750                        | 49152                  | 5.0                                             |
| CaffH:H <sub>2</sub> O      | Static                                     | QCPMG                          | 5120         | 2.8                       | 2.0                  | 500                                           | 50     | 1.0                                | 500                        | 31744                  | 5.0                                             |
|                             | MAS (20)                                   | QCPMG                          | 512          | 0.4                       | 3.0                  | 500                                           | 45     | 2.0                                | 250                        | 14336                  | 5.0                                             |
| CaffH                       | Static                                     | QCPMG                          | 3840         | 4.3                       | 4.0                  | 400                                           | 70     | 1.0                                | 500                        | 35840                  | 2.5                                             |
| AcetH-Acet                  | Static                                     | QCPMG                          | 3504         | 3.9                       | 4.0                  | 500                                           | 55     | 2.0                                | 250                        | 17408                  | 8.34                                            |
|                             | MAS (20)                                   | QCPMG                          | 2048         | 1.1                       | 2.0                  | 750                                           | 45     | 2.0                                | 250                        | 14336                  | 5.0                                             |
| AcetH:H <sub>2</sub> O      | Static                                     | Hahn Echo                      | 8192         | 6.8                       | 3.0                  | -                                             | 1      | 5.0                                | 100                        | 1024                   | 5.0                                             |
|                             | MAS (15)                                   | Hahn Echo                      | 1568         | 1.3                       | 3.0                  | -                                             | 1      | 5.0                                | 100                        | 1024                   | 5.0                                             |
| AcetH-Acet:H <sub>2</sub> O | Static                                     | Hahn Echo                      | 5120         | 4.3                       | 3.0                  | -                                             | 1      | 5.0                                | 100                        | 1024                   | 25.0                                            |
|                             | MAS (10)                                   | Bloch Decay                    | 2048         | 1.7                       | 3.0                  | -                                             | -      | 5.0                                | 100                        | 2048                   | 25.0                                            |

<sup>a</sup> Pulse sequences include Bloch decay (single 90° pulse), Hahn echo (90°- $\tau$ -180°- $\tau$ -acq), quadrupolar Carr-Purcell Meiboom-Gill (QCPMG), and wideband uniform-rate smooth truncation/CPMG (WURST-CPMG or WCPMG). These sequences used 8, 8, 16-, and 16-step phase cycles, respectively.

<sup>b</sup> The echo length is defined as the time between 180° pulses.

**Table S2.** <sup>37</sup>Cl SSNMR acquisition parameters at 18.8 T.

| Material                    | Pulse Sequence <sup>a</sup> | No. Scans | Experimental Time (hr) | Recycle Delay (s) | Echo Length (μs) <sup>b</sup> | Echoes | Dwell Time (μs) | Spectral Width (kHz) | Time Domain Size | Pulse width [π/2] (μs) | Contact Time (ms) |
|-----------------------------|-----------------------------|-----------|------------------------|-------------------|-------------------------------|--------|-----------------|----------------------|------------------|------------------------|-------------------|
| NicH-Nic:H <sub>2</sub> O   | Hahn Echo                   | 16384     | 9.1                    | 2.0               | -                             | 1      | 2.5             | 200                  | 2048             | 12.50                  | -                 |
| NicH                        | QCPMG                       | 10240     | 14.2                   | 5.0               | 800                           | 35     | 1.0             | 500                  | 32768            | 5.0                    | -                 |
| IsoH-Iso:H <sub>2</sub> O   | QCPMG                       | 512       | 1.0                    | 7.0               | 300                           | 90     | 1.25            | 400                  | 26624            | 3.57                   | -                 |
| IsoH                        | QCPMG                       | 1024      | 1.1                    | 5.0               | 1000                          | 33     | 4.0             | 125                  | 9216             | 8.33                   | -                 |
| PicH-Pic                    | QCPMG                       | 20480     | 5.7                    | 1.0               | 4000                          | 9      | 10.0            | 50                   | 3584             | 25.0                   | -                 |
| PicH:H <sub>2</sub> O       | QCPMG                       | 4096      | 4.0                    | 3.5               | 200                           | 19     | 5.0             | 100                  | 6144             | 12.5                   | -                 |
| PicH                        | Hahn Echo                   | 4096      | 5.7                    | 5.0               | -                             | 1      | 2.0             | 250                  | 4096             | 25.0                   | -                 |
| NicAH                       | QCPMG                       | 6784      | 6.6                    | 3.5               | 600                           | 60     | 1.25            | 400                  | 30720            | 2.5                    | -                 |
| IsoAH                       | QCPMG                       | 20480     | 17.1                   | 3.0               | 700                           | 28     | 2.0             | 250                  | 10240            | 3.57                   | -                 |
| PicAH-PicA                  | QCPMG                       | 12288     | 14.2                   | 4.0               | 1000                          | 28     | 2.0             | 250                  | 16384            | 5.0                    | -                 |
| PicAH                       | WCPMG                       | 14122     | 11.8                   | 3.0               | 300                           | 42     | 1.0             | 500                  | 16384            | 5.0                    | -                 |
| CaffH:H <sub>2</sub> O      | QCPMG                       | 8192      | 11.4                   | 5.0               | 300                           | 32     | 1.0             | 500                  | 10240            | 5.0                    | -                 |
| CaffH                       | QCPMG                       | 16384     | 13.6                   | 3.0               | 500                           | 50     | 1.25            | 400                  | 20480            | 3.57                   | -                 |
| AcetH-Acet                  | QCPMG                       | 4096      | 4.6                    | 4.0               | 1000                          | 17     | 2.0             | 250                  | 10240            | 25                     | -                 |
| AcetH:H <sub>2</sub> O      | CP-CPMG                     | 2048      | 0.3                    | 2.5               | 1400                          | 17     | 5.0             | 100                  | 5120             | 25.0                   | 20                |
| AcetH-Acet:H <sub>2</sub> O | QCPMG                       | 5120      | 5.7                    | 4.0               | 1400                          | 6      | 10.0            | 50                   | 3072             | 25.0                   | -                 |

**Table S3.**  $pK_a$  values of various molecules.

| Molecule    | $pK_a$ |
|-------------|--------|
| <b>Iso</b>  | 3.61   |
| <b>Nic</b>  | 3.35   |
| <b>Pic</b>  | 2.10   |
| <b>NicA</b> | 2.08   |
| <b>IsoA</b> | 1.70   |
| <b>PicA</b> | 1.60   |

The  $pK_a$  values of these molecules are reported by Jellinek and Urwin, *1954*.  
See Ref. 123.

**Table S4.** Enthalpies of formation for the materials with known crystal structures.

| <b>Material</b>                | <b><math>\Delta H_f^a</math> (kJ mol<sup>-1</sup>)</b> |
|--------------------------------|--------------------------------------------------------|
| <b>NicH</b>                    | -0.19                                                  |
| <b>NicH-Nic:H<sub>2</sub>O</b> | 0.05                                                   |
| <b>Nic-Iso</b>                 | 10.60                                                  |
| <b>IsoH</b>                    | -10.69                                                 |
| <b>PicH:H<sub>2</sub>O</b>     | 7.07                                                   |
| <b>NicAH</b>                   | -0.21                                                  |
| <b>IsoAH</b>                   | -0.21                                                  |
| <b>PicAH</b>                   | 8.12                                                   |
| <b>PicAH:H<sub>2</sub>O</b>    | 8.34                                                   |

<sup>a</sup> Static lattice energies obtained from DFT-D2\* calculations were computed from refinement of crystal structures of all known materials and starting reagents. Water is modelled as an isolated molecule.

Derived from the equation:

$$\Delta H_f = H_{product} - (AH_{educt}^{(1)} + BH_{educt}^{(2)} + CH_{water})$$

Example for **PicH:H<sub>2</sub>O**:

$$\Delta H_f = H_{PicH:H2O} - (H_{Pic}^{(1)} + H_{HCl}^{(2)} + H_{water})$$

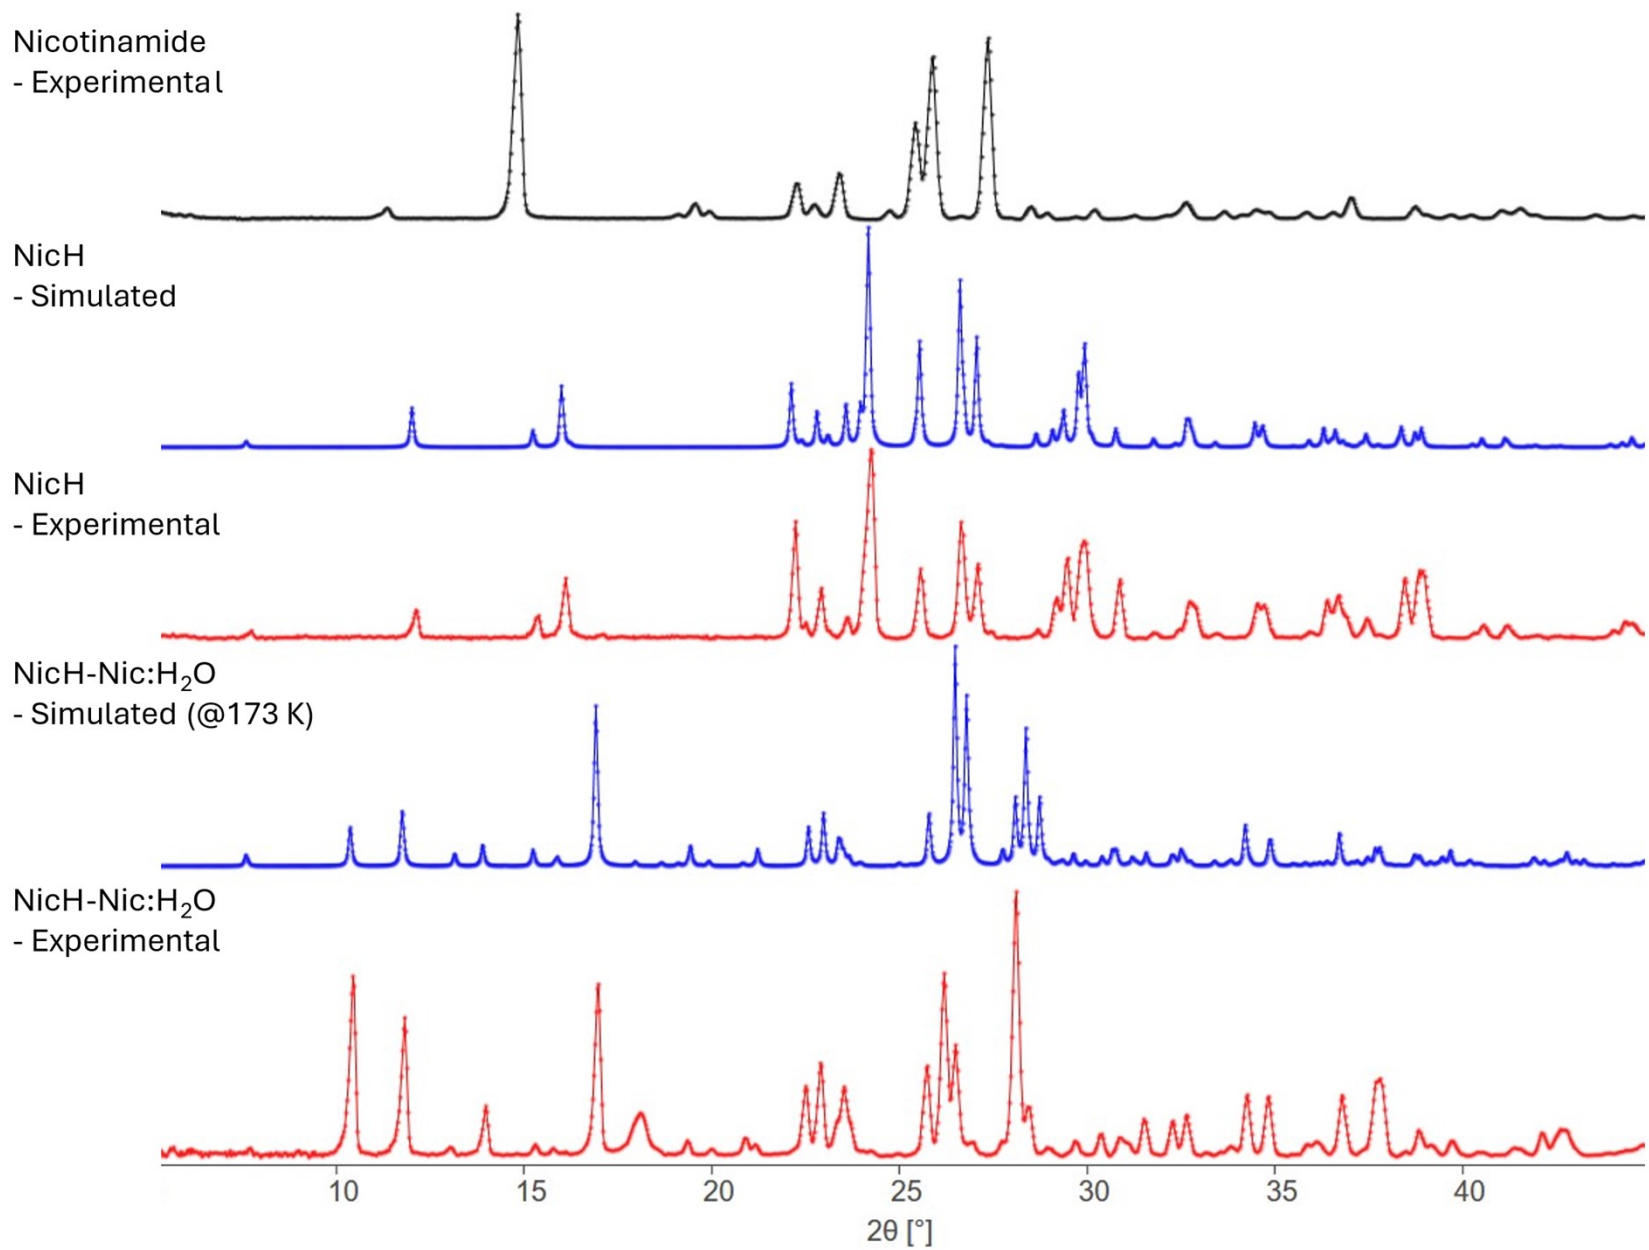

**Fig. S1.** Experimental and simulated PXR D patterns of nicotinamide, **NicH**, and **NicH-Nic:H<sub>2</sub>O**.

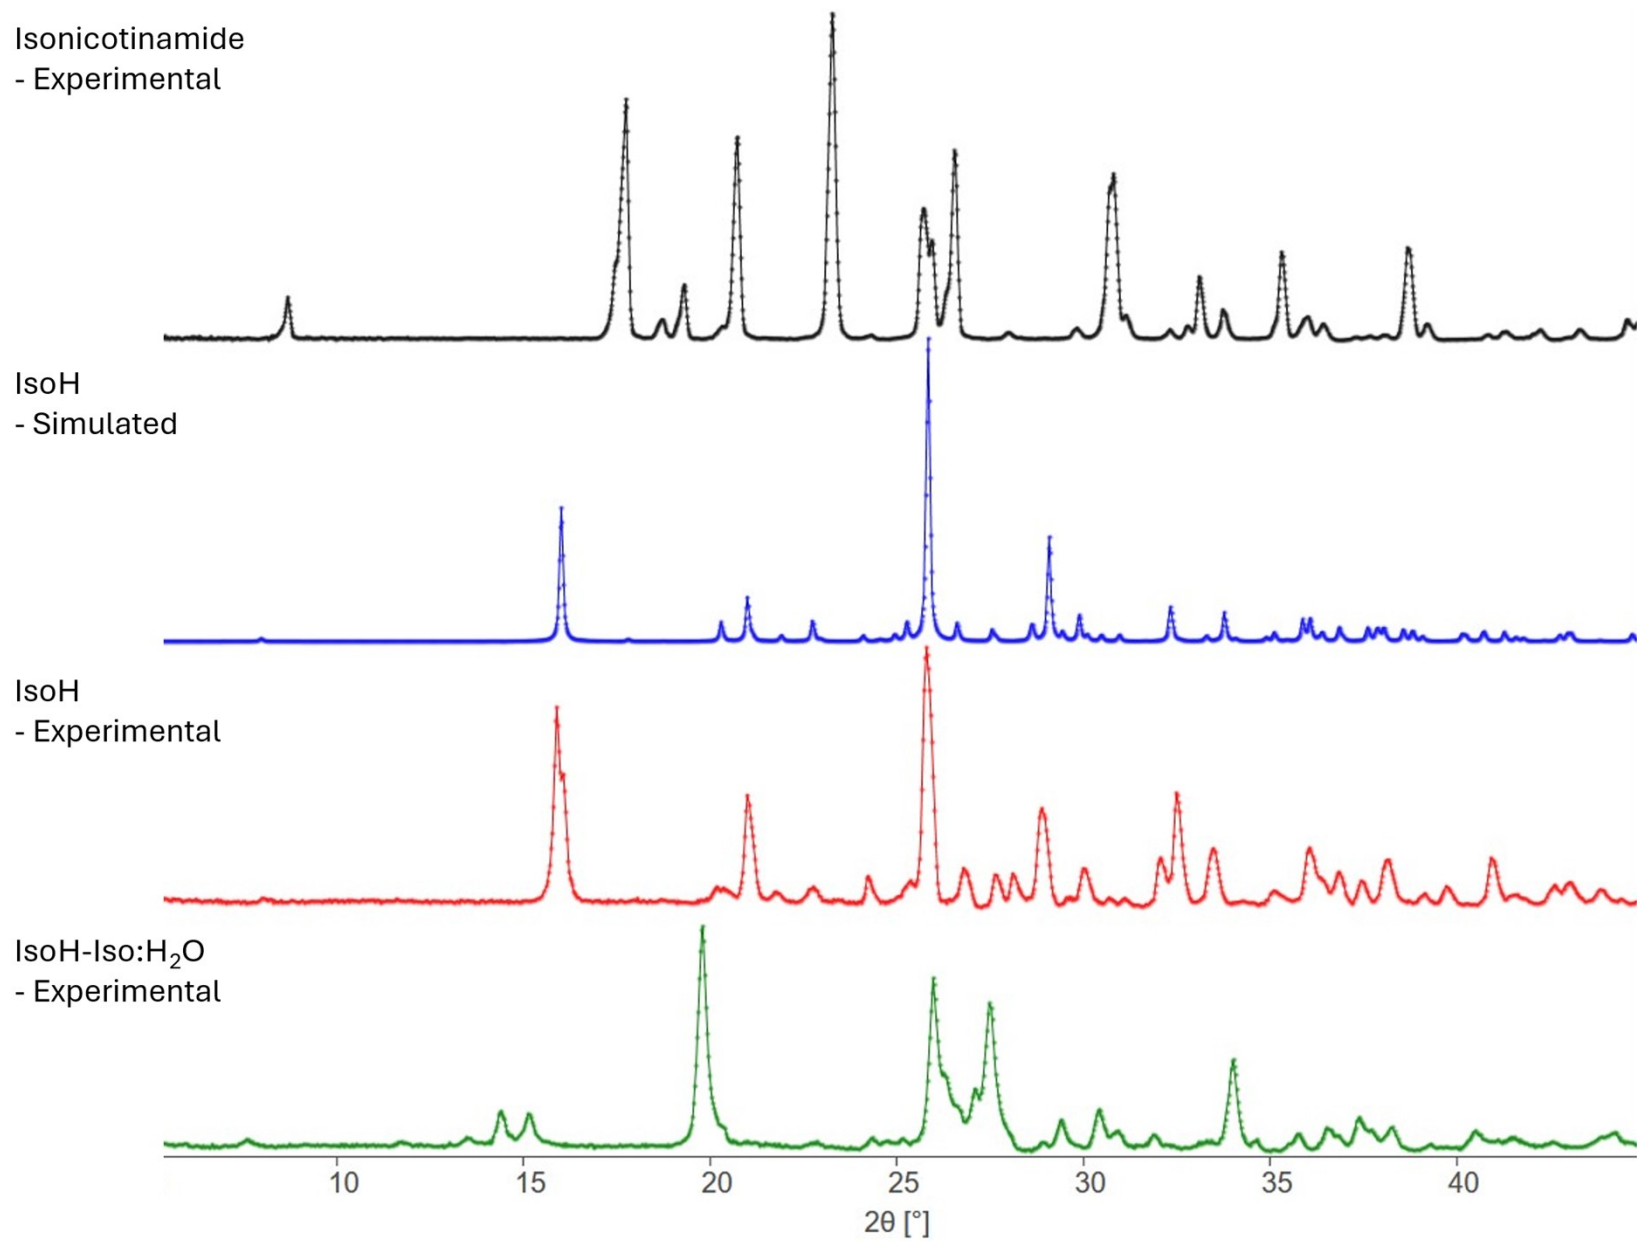

**Fig. S2.** Experimental and simulated PXRD patterns of isonicotinamide, **IsoH** and **IsoH-Iso:H<sub>2</sub>O**.

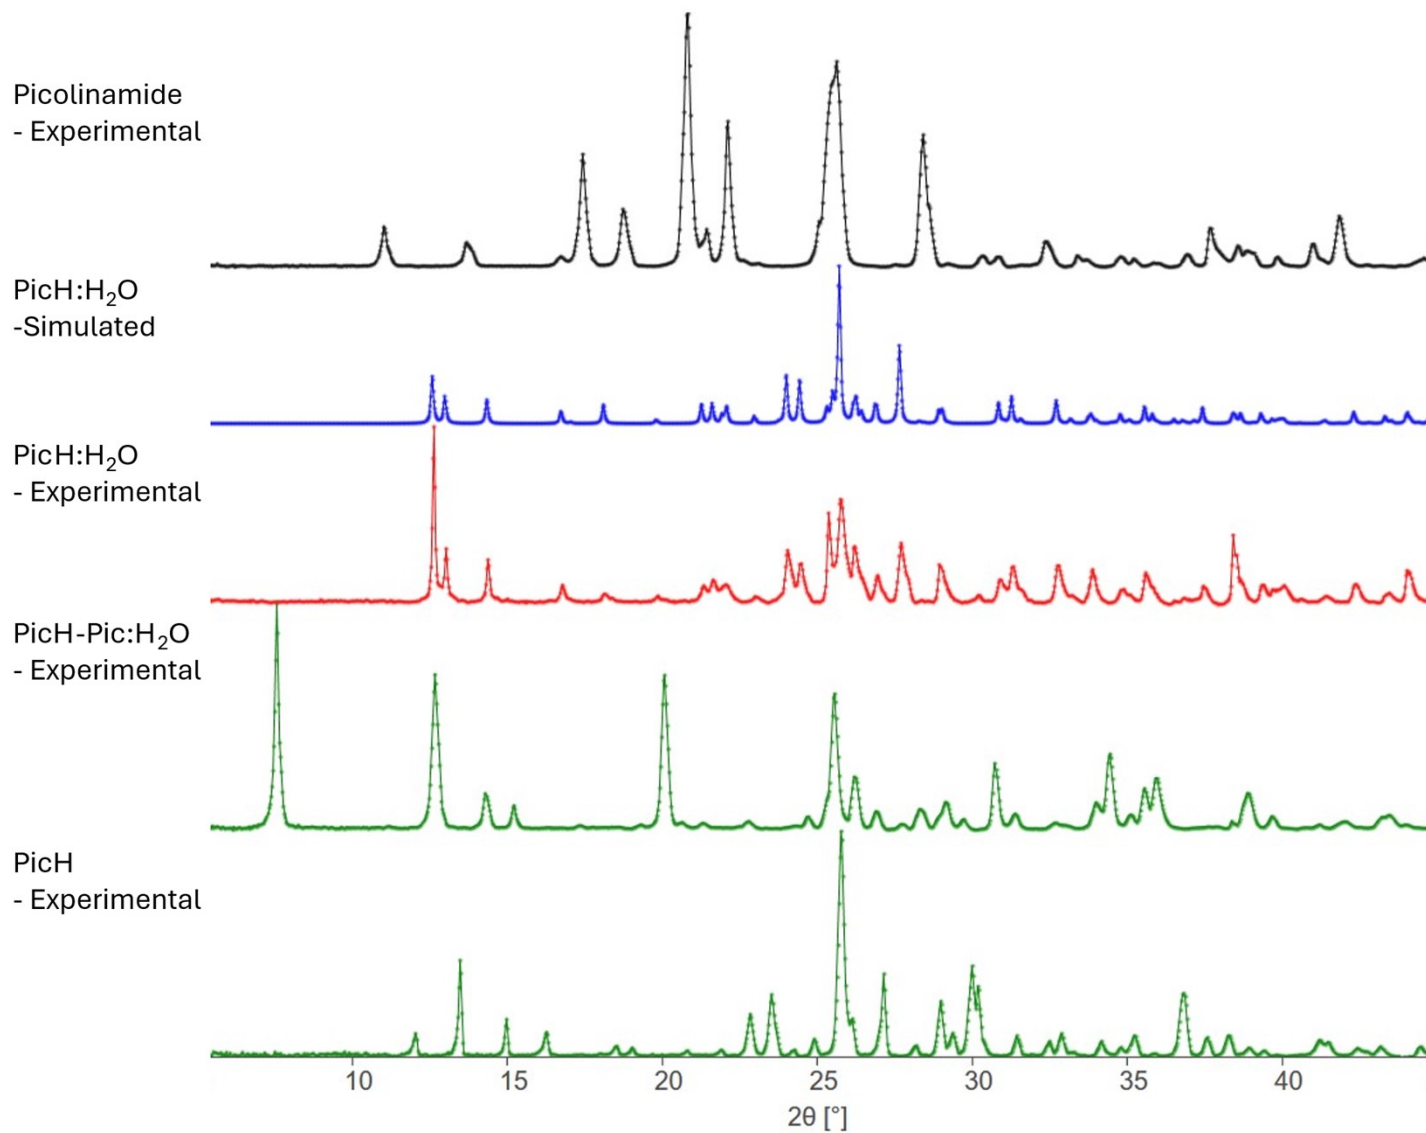

**Fig. S3.** Experimental and simulated PXRD patterns of picolinamide, **PicH:H<sub>2</sub>O**, **PicH-Pic:H<sub>2</sub>O**, and **PicH**.

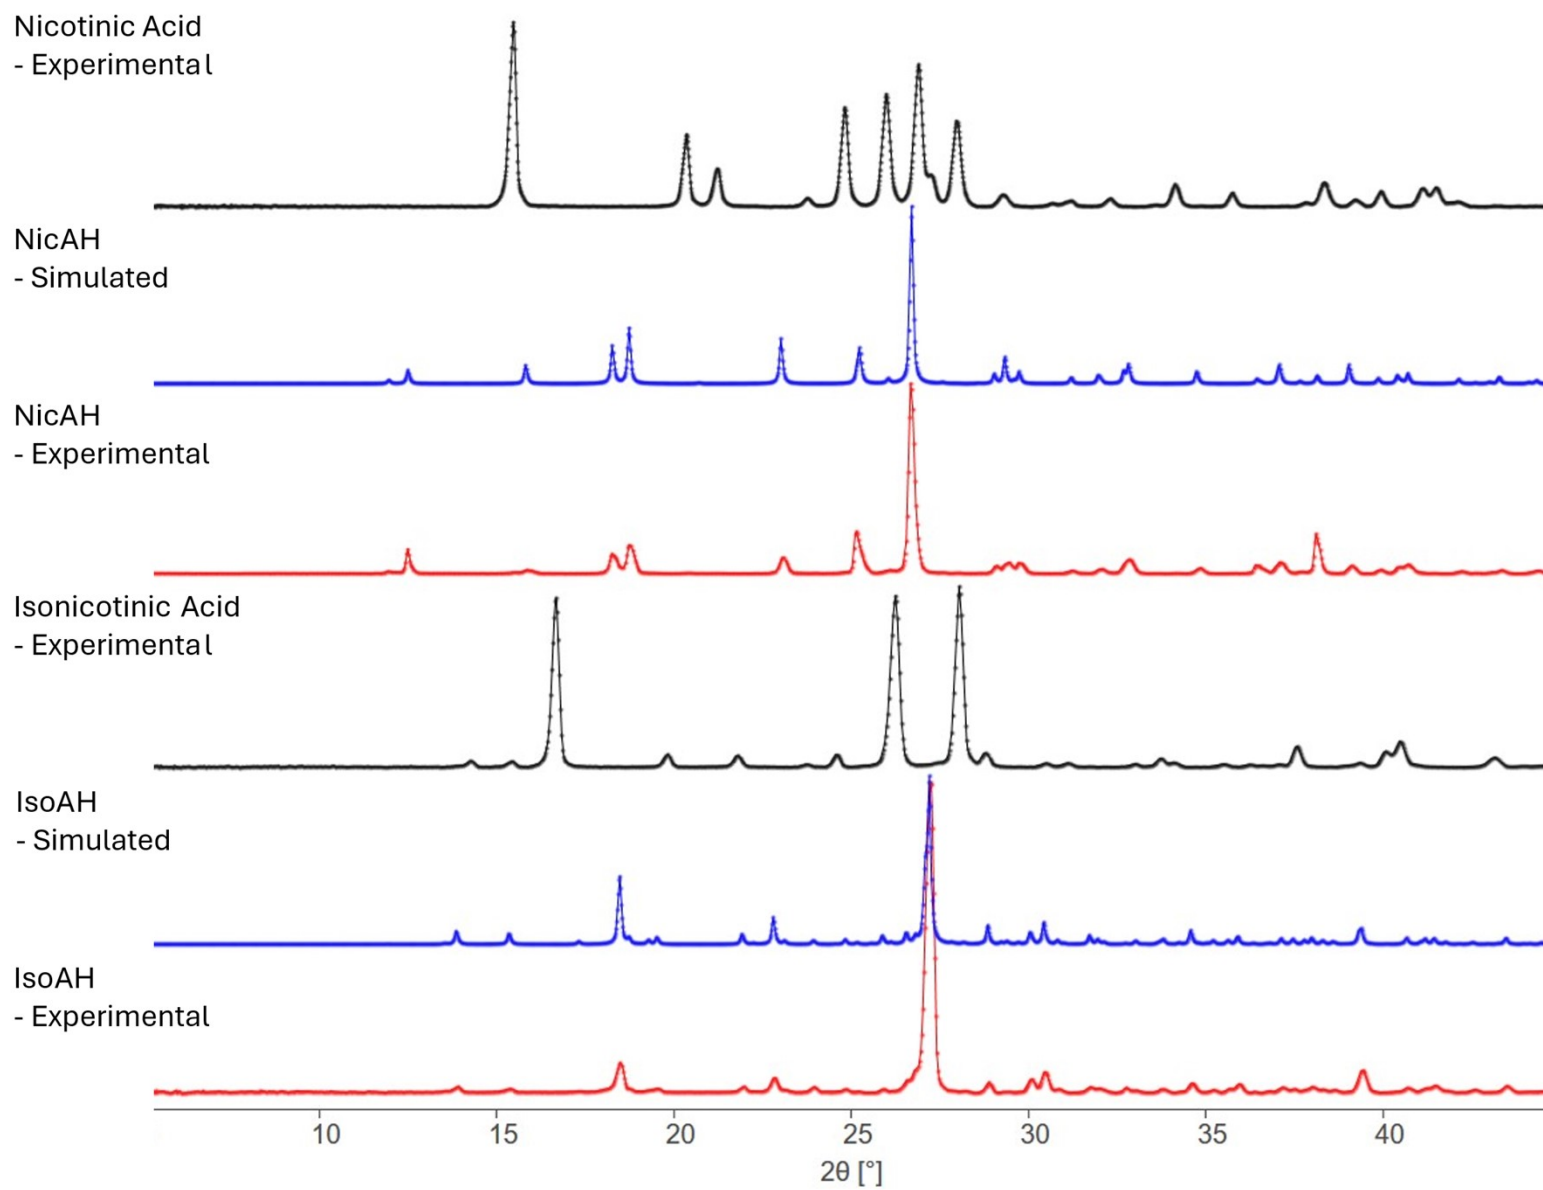

**Fig. S4.** Experimental and simulated PXRD patterns of nicotinic acid, isonicotinic acid, **NicAH**, and **IsoAH**.

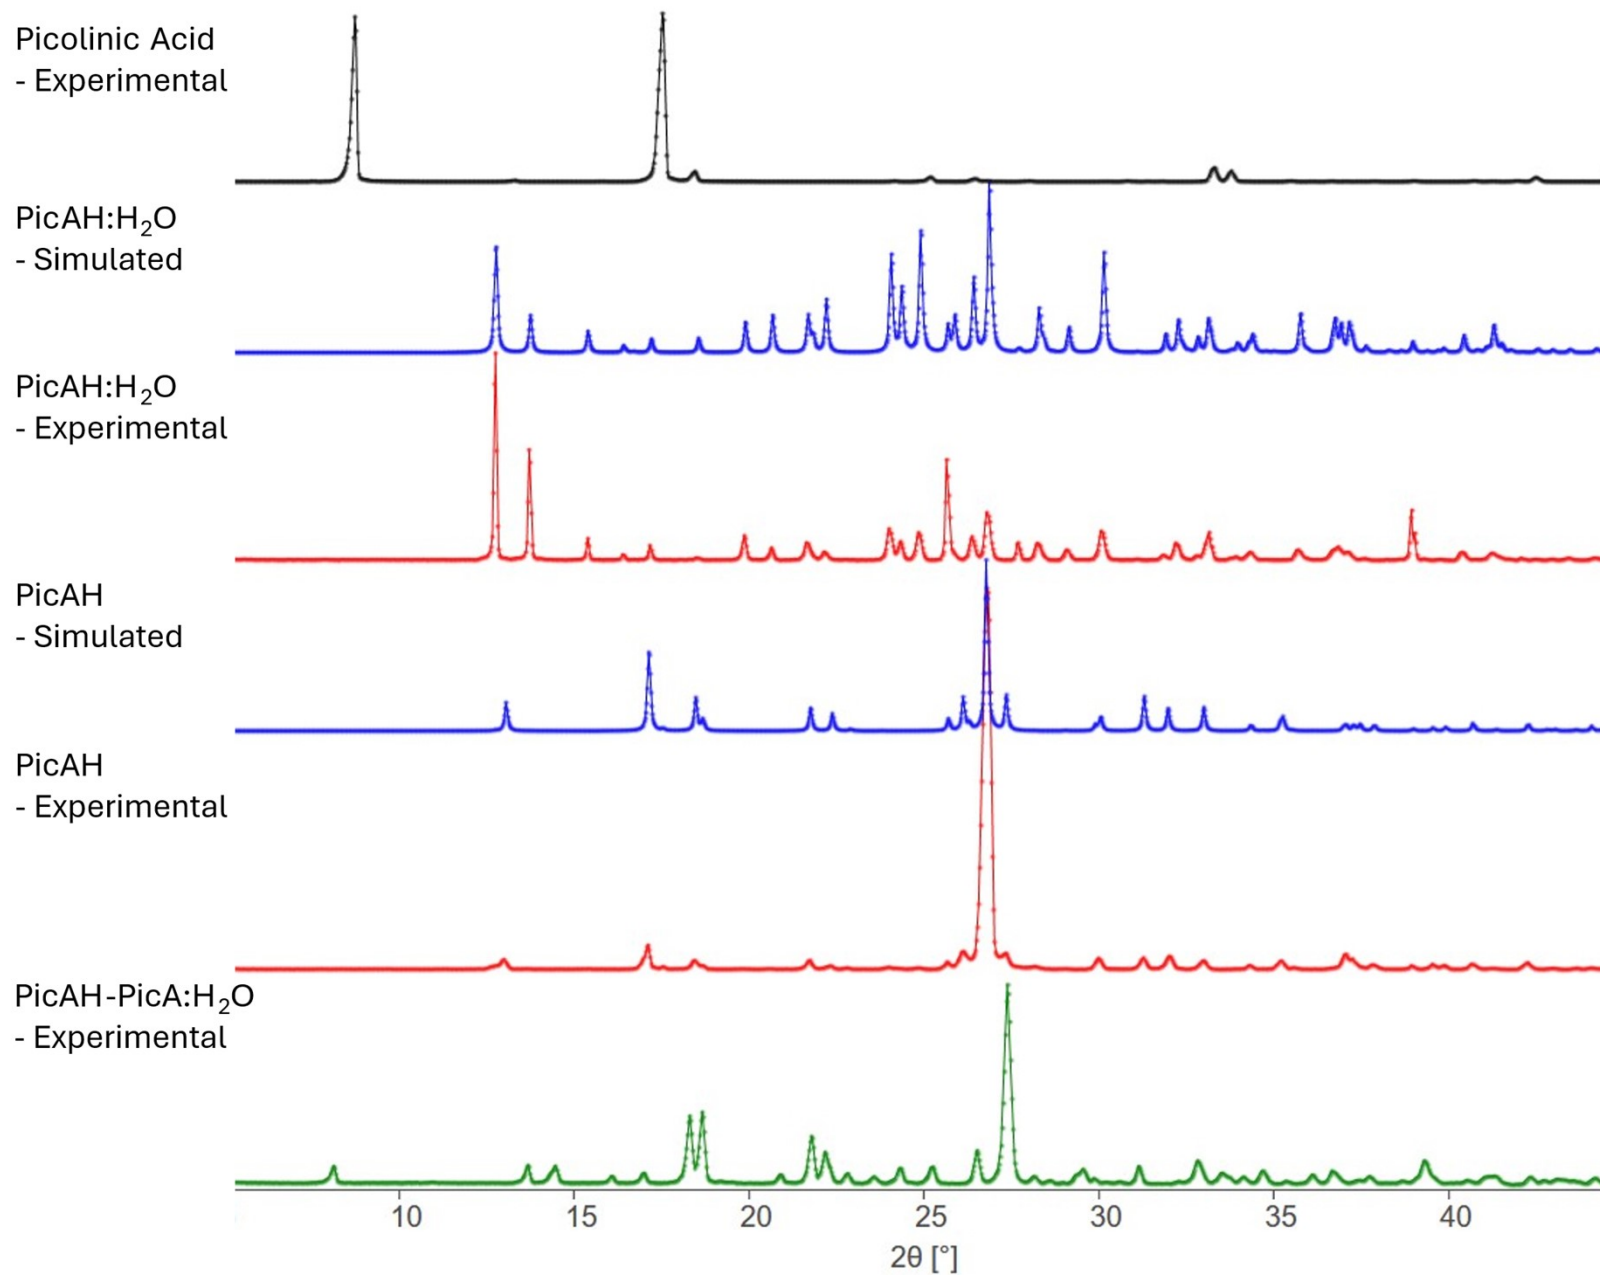

Fig. S5. Experimental and simulated PXRD patterns of picolinic acid, **PicAH:H<sub>2</sub>O**, **PicAH** and **PicAH-PicA:H<sub>2</sub>O**.

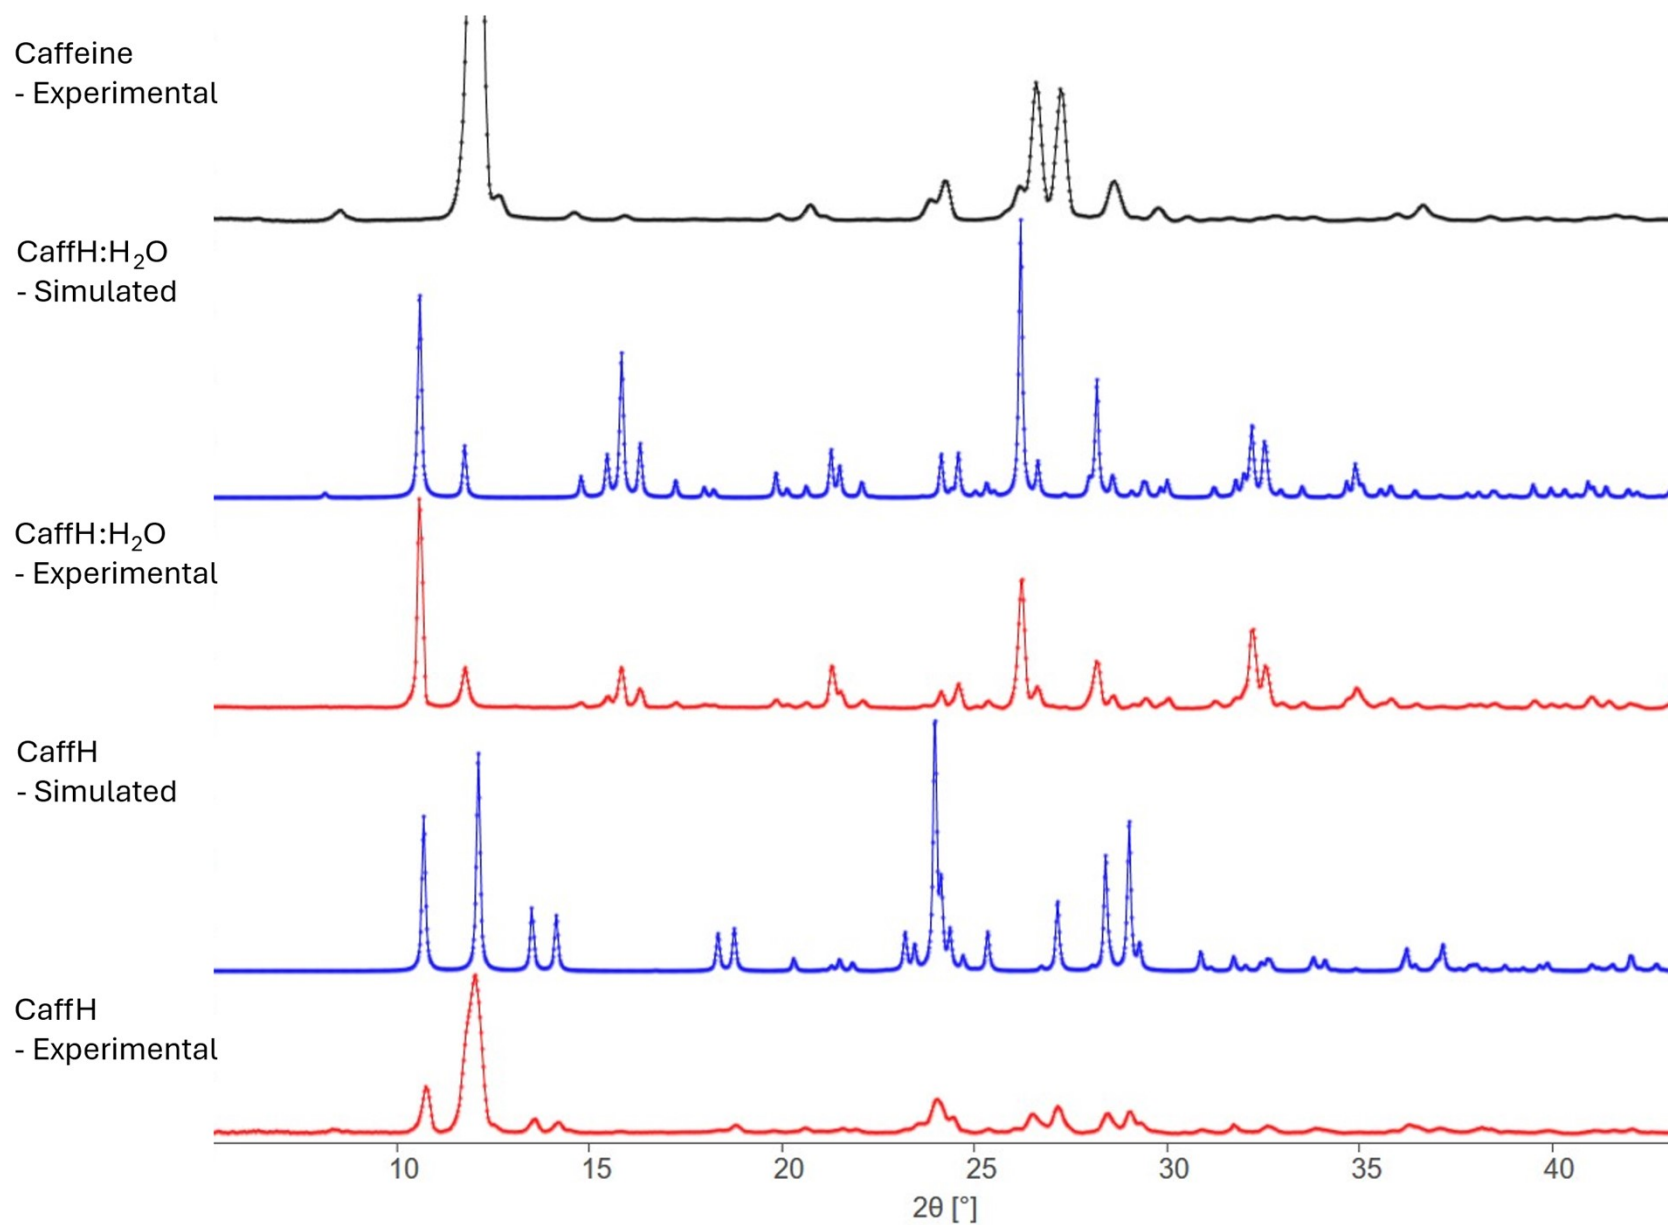

Fig. S6. Experimental and simulated PXRD patterns of caffeine, **CaffH:H<sub>2</sub>O**, and **CaffH**.

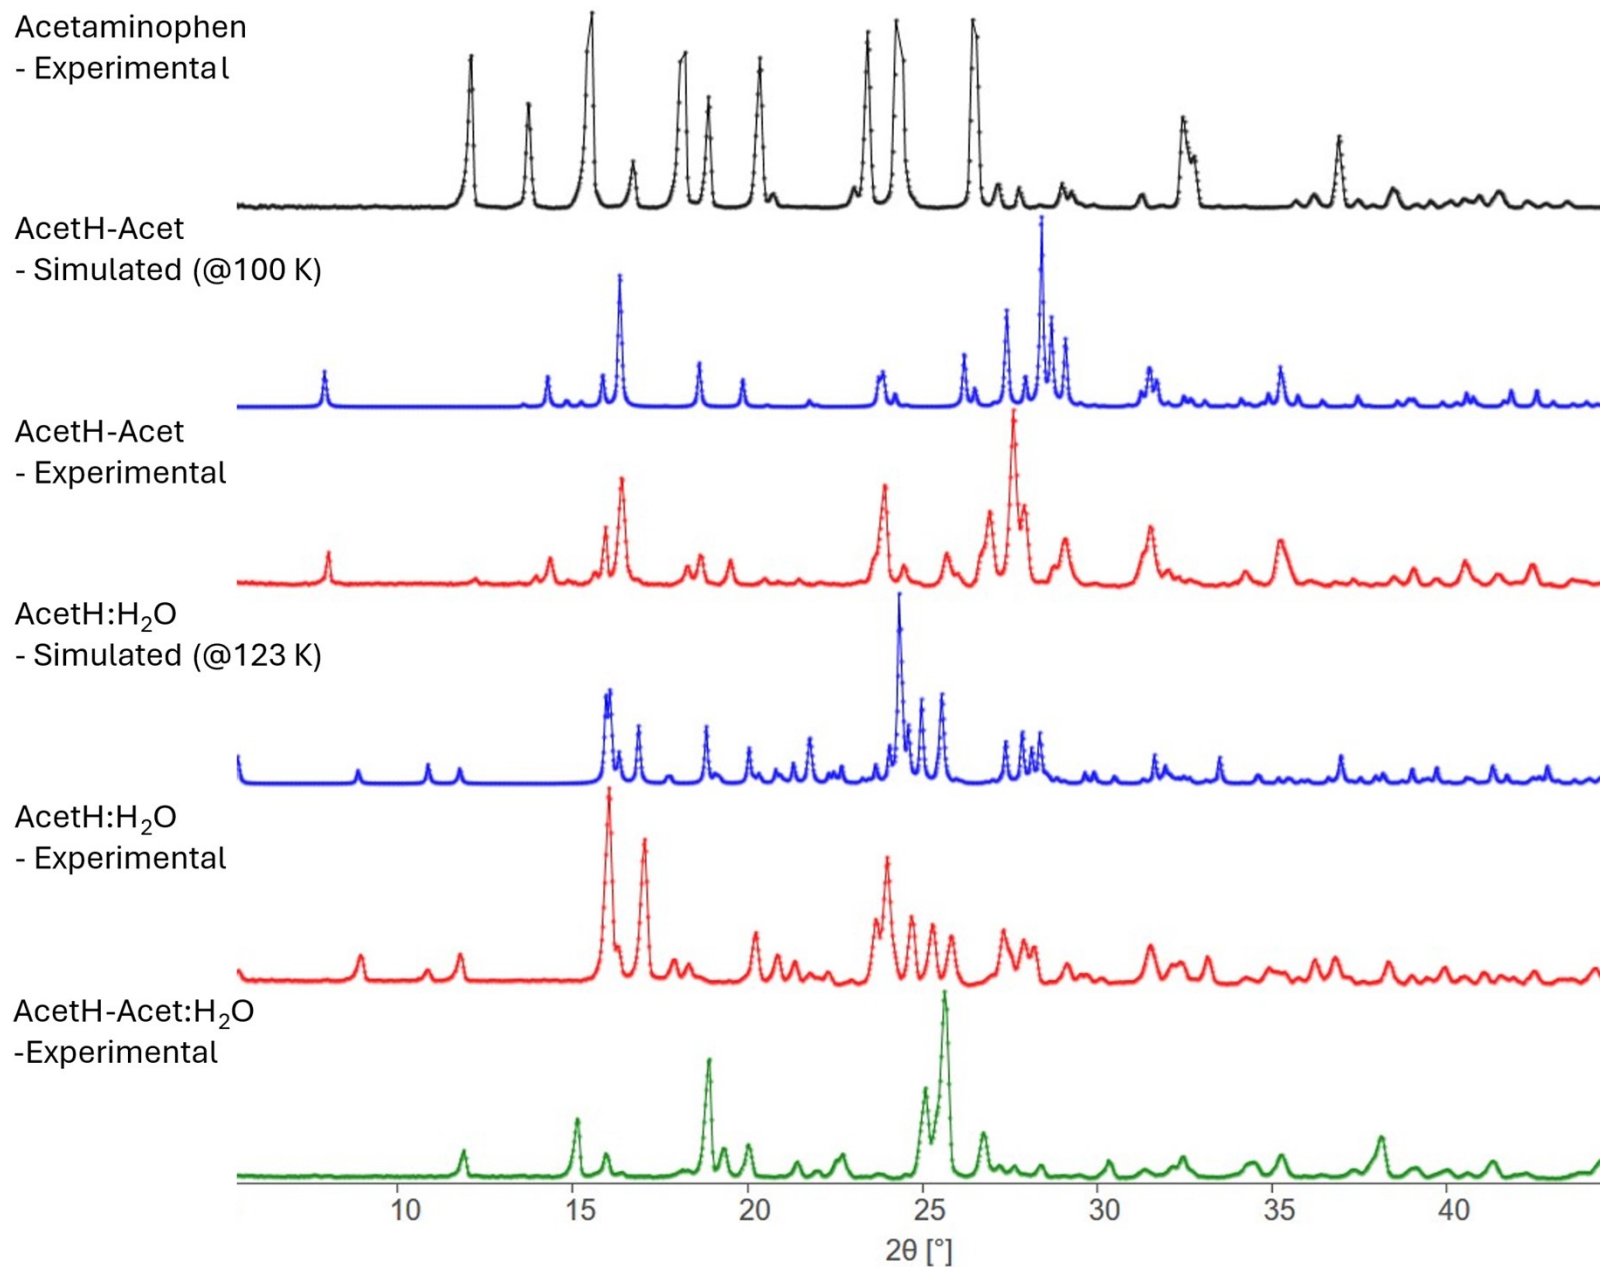

**Fig. S7.** Experimental and simulated PXRD patterns of acetaminophen, **AcetH-Acet**, **AcetH:H<sub>2</sub>O**, **AcetH-Acet:H<sub>2</sub>O**.

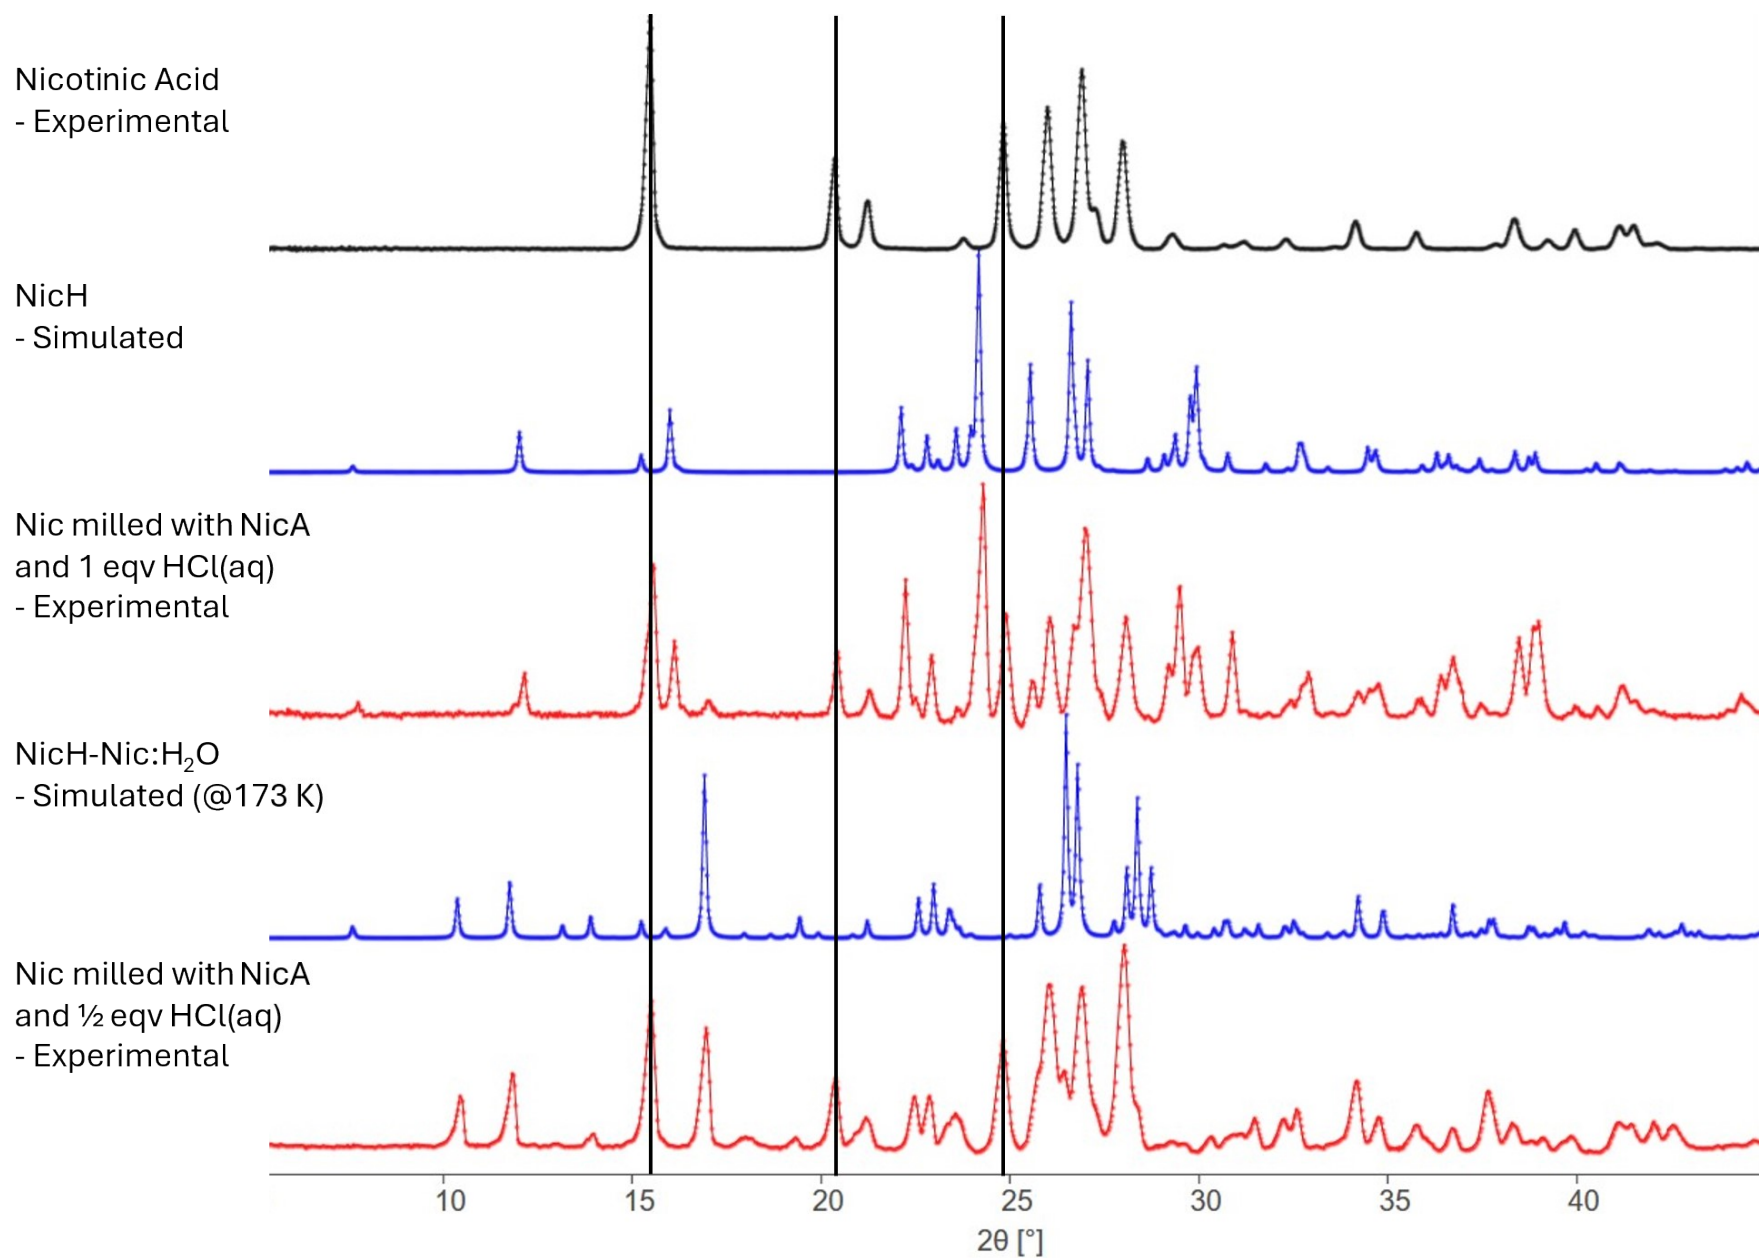

**Fig. S8.** PXRD patterns of NicA, NicH, and NicH-Nic:H<sub>2</sub>O and competitive milling reactions between Nic and NicA.

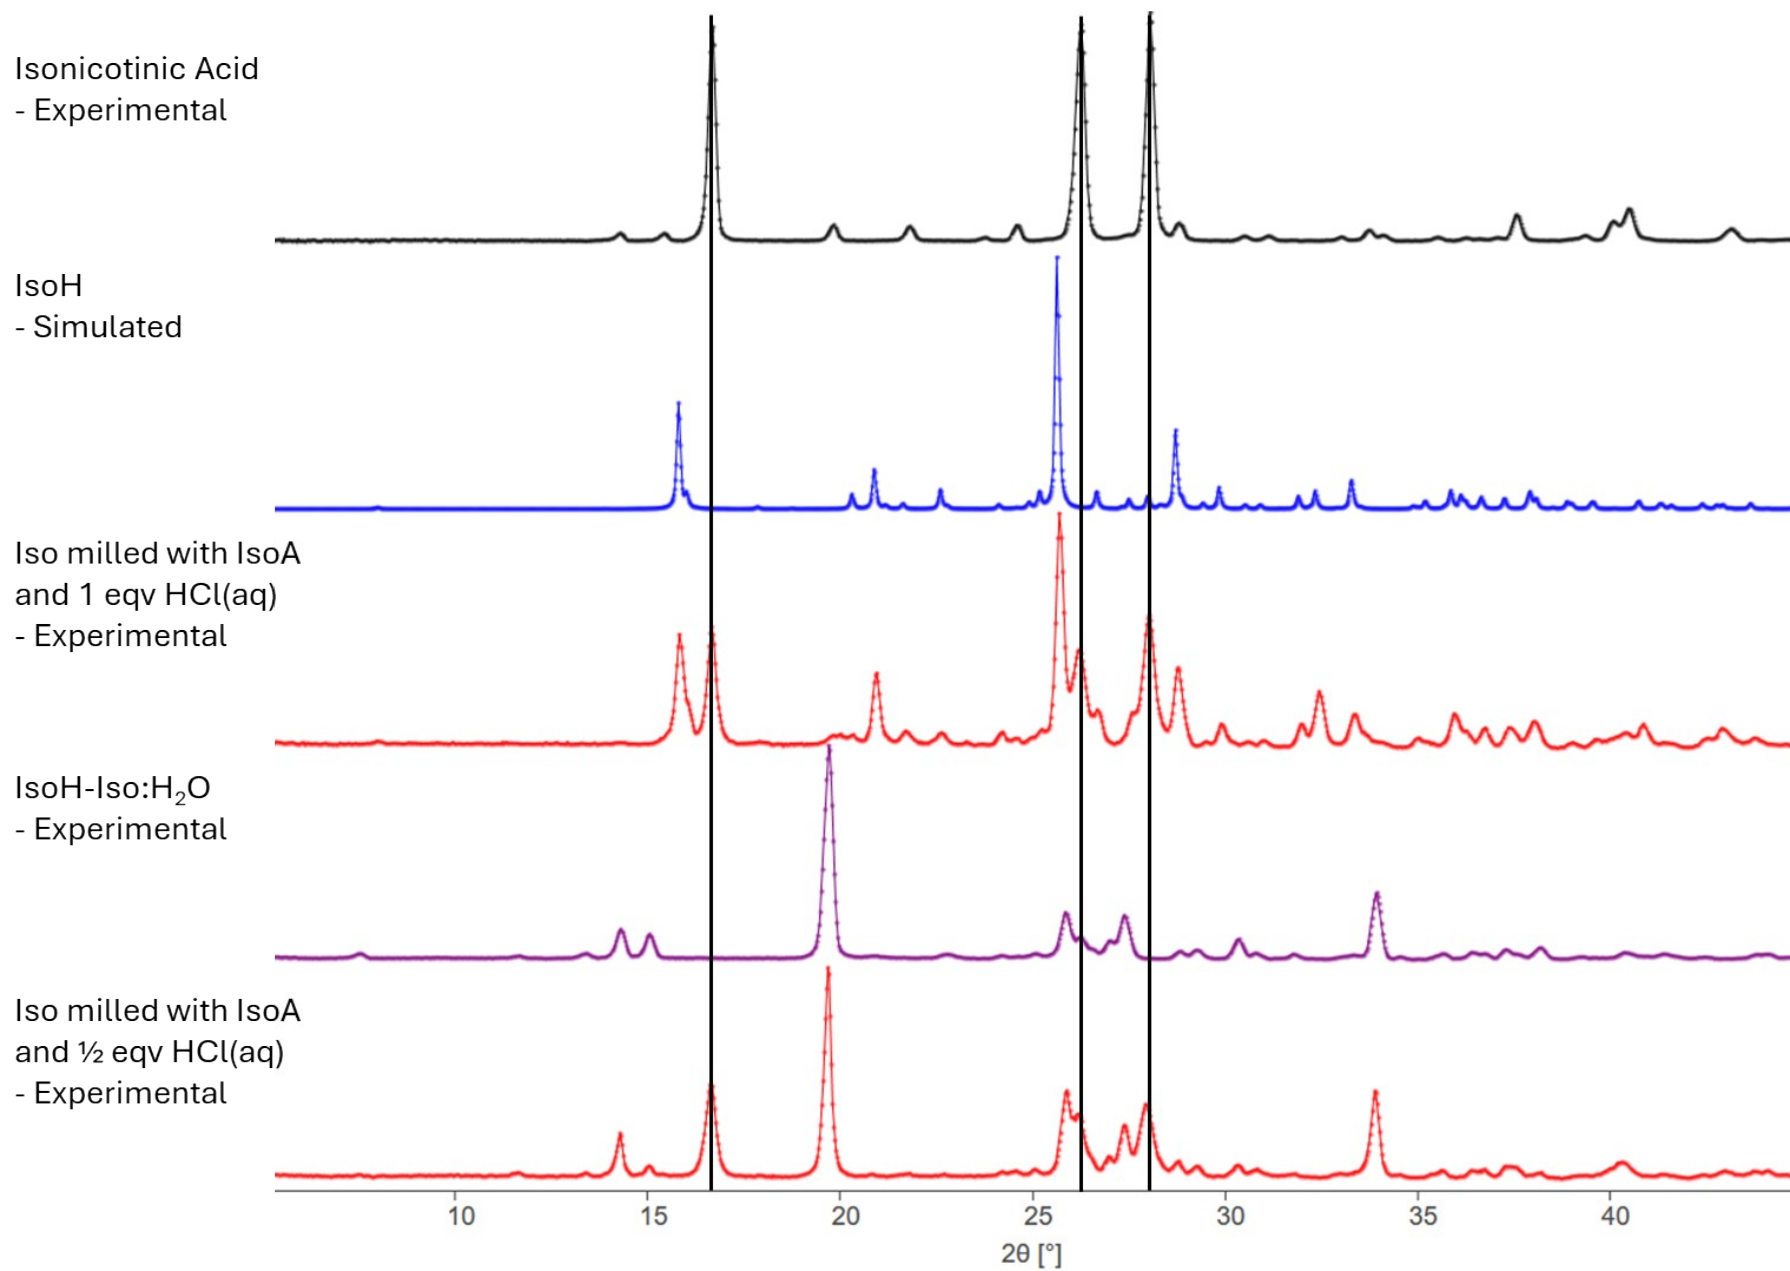

**Fig. S9.** PXRD patterns of **IsoA**, **IsoH**, and **IsoH-Iso:H<sub>2</sub>O** and competitive milling reactions between **Iso** and **IsoA**.

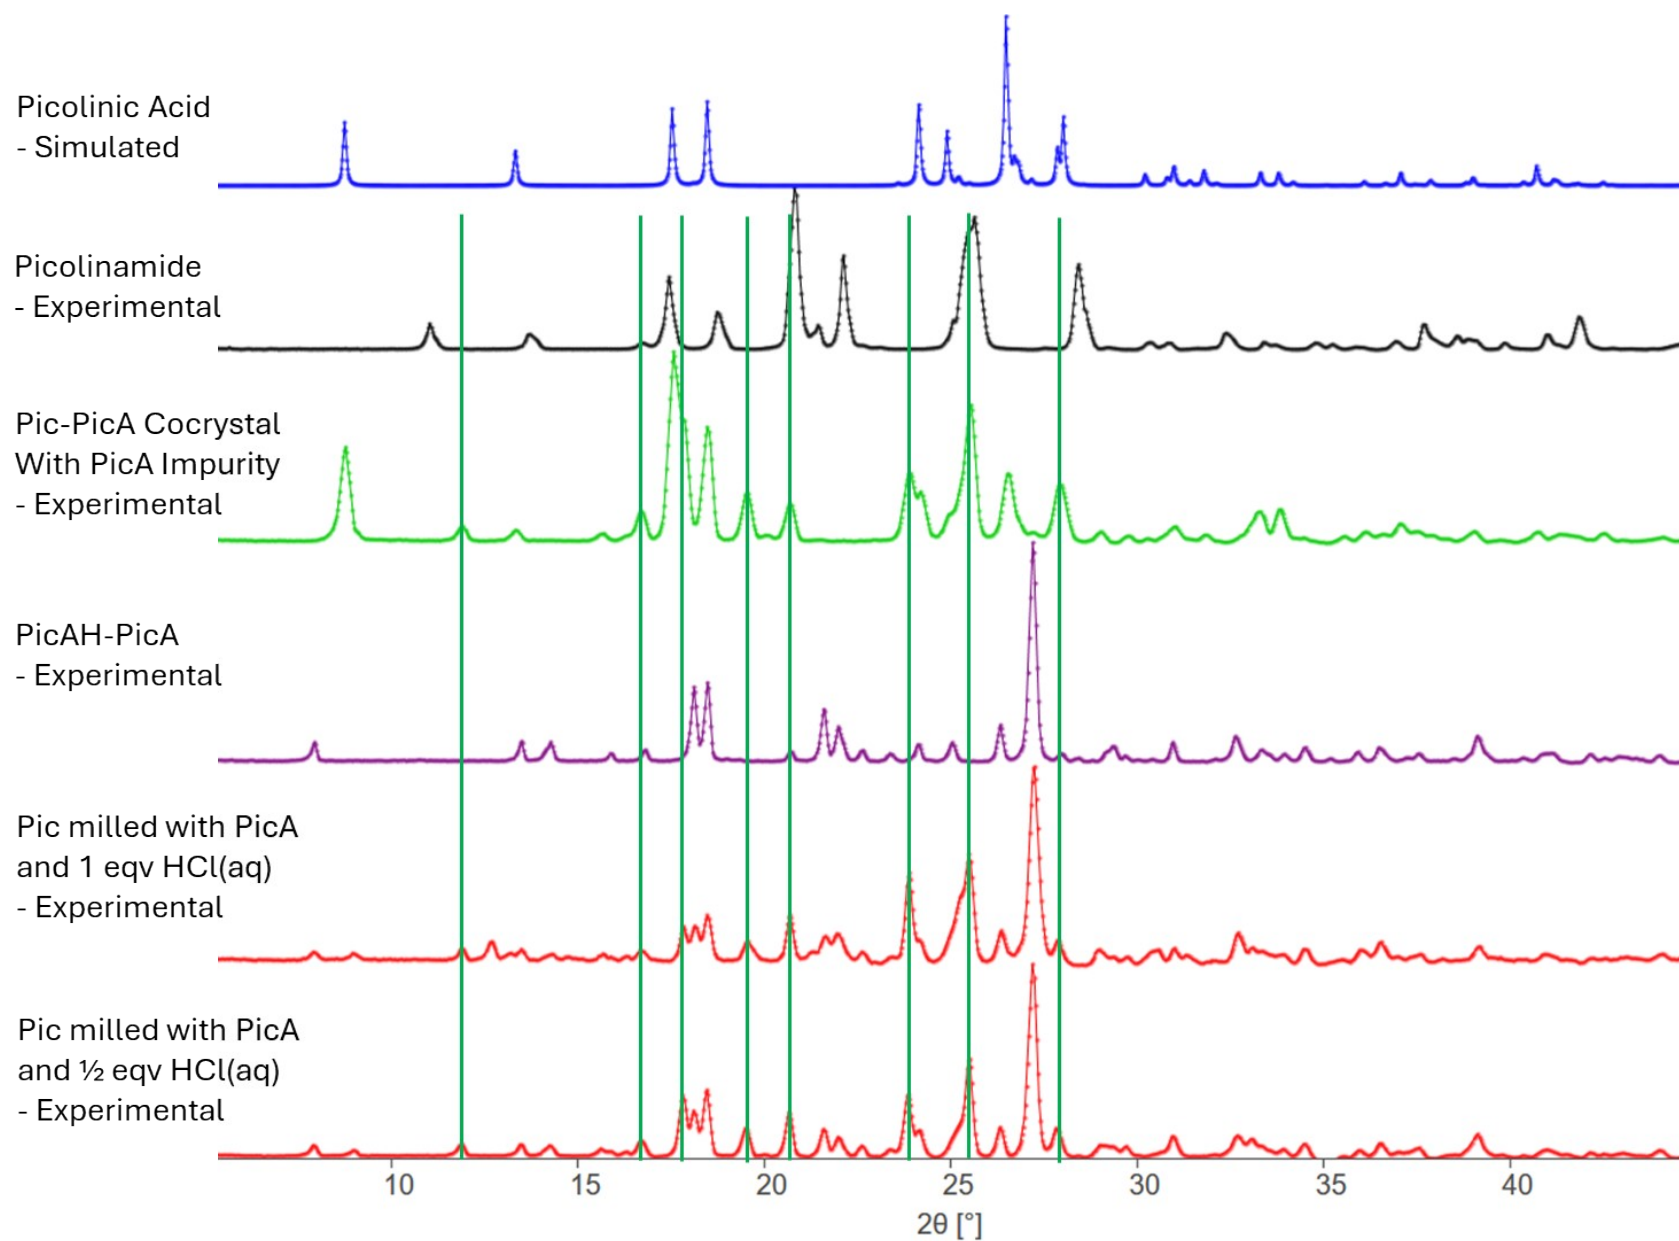

**Fig. S10.** PXRD patterns of **Pic**, **PicA**, **Pic-PicA**, **PicAH-PicA** and competitive milling reactions between **Pic** and **PicA**.

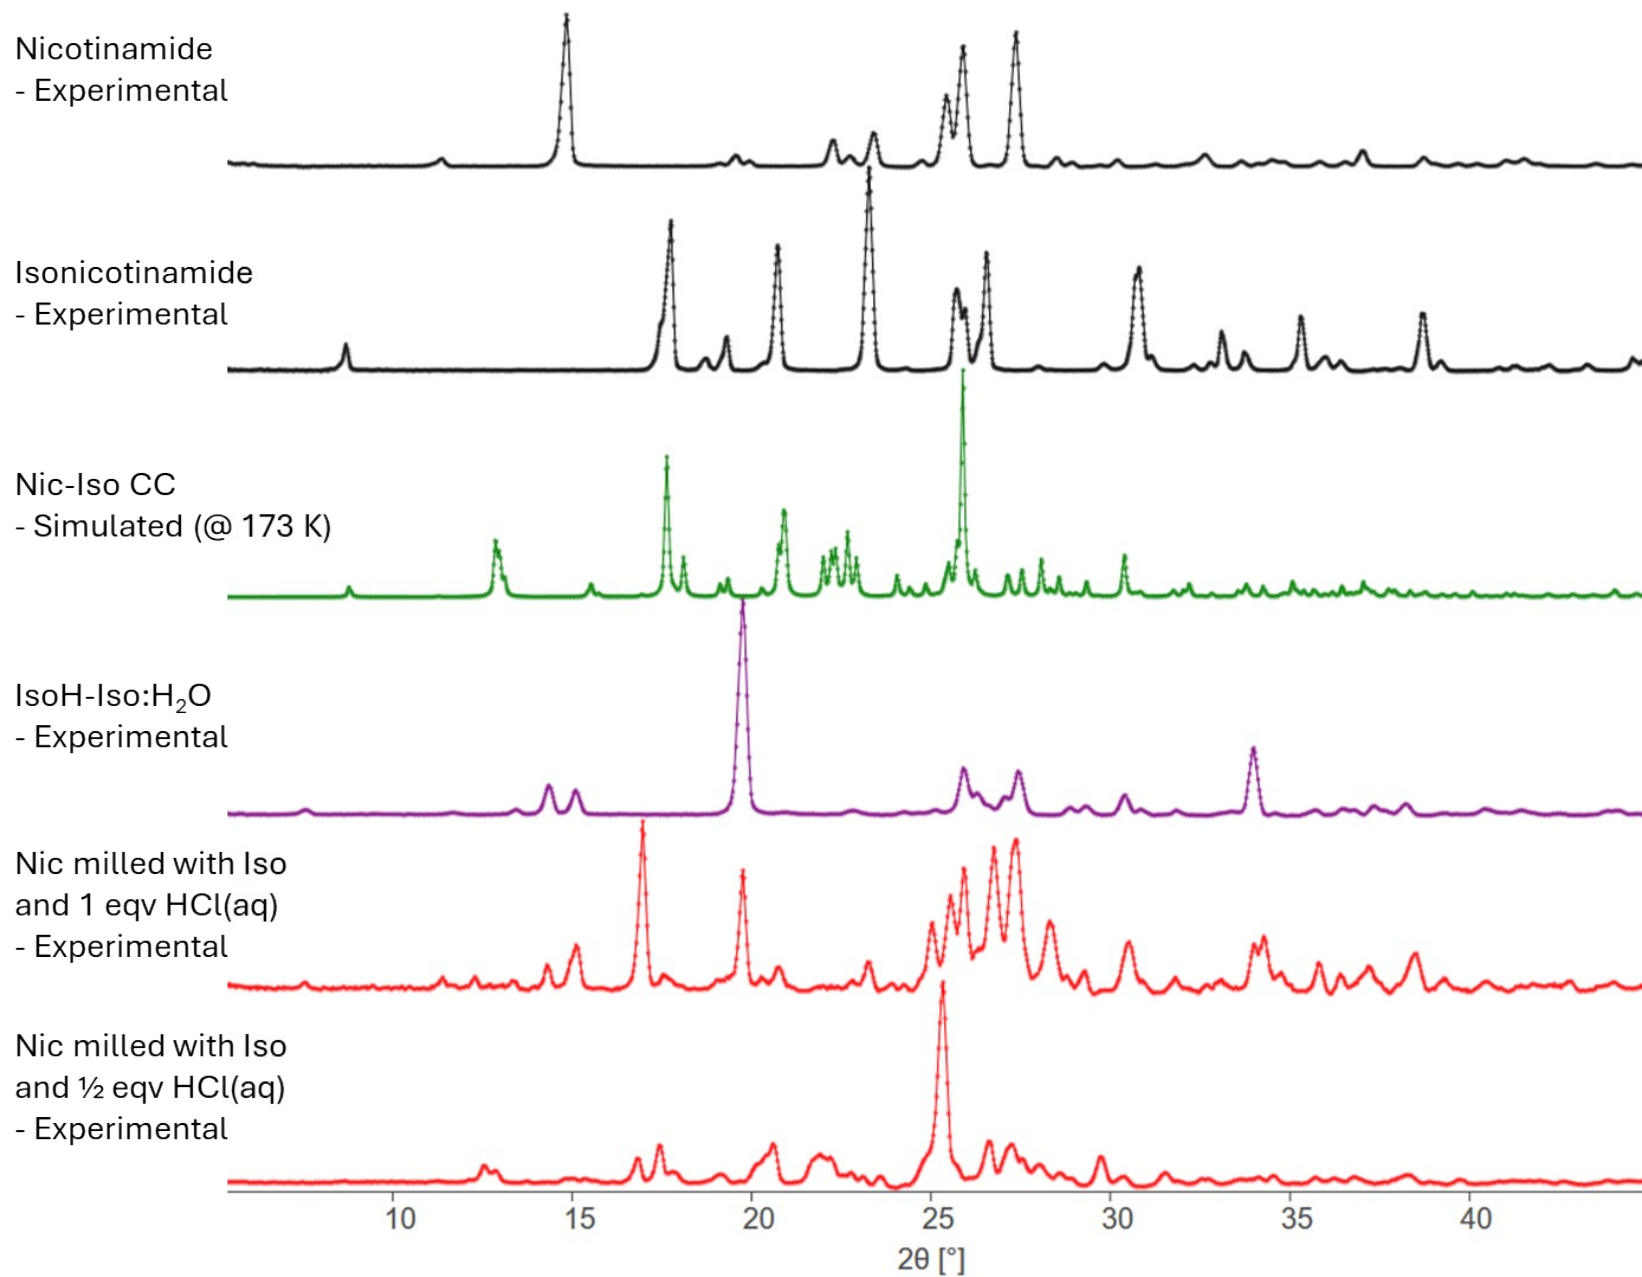

**Fig. S11.** PXRD patterns of Nic, Iso, Nic-Iso, IsoH-Iso:H<sub>2</sub>O and competitive milling reactions between Nic and Iso.

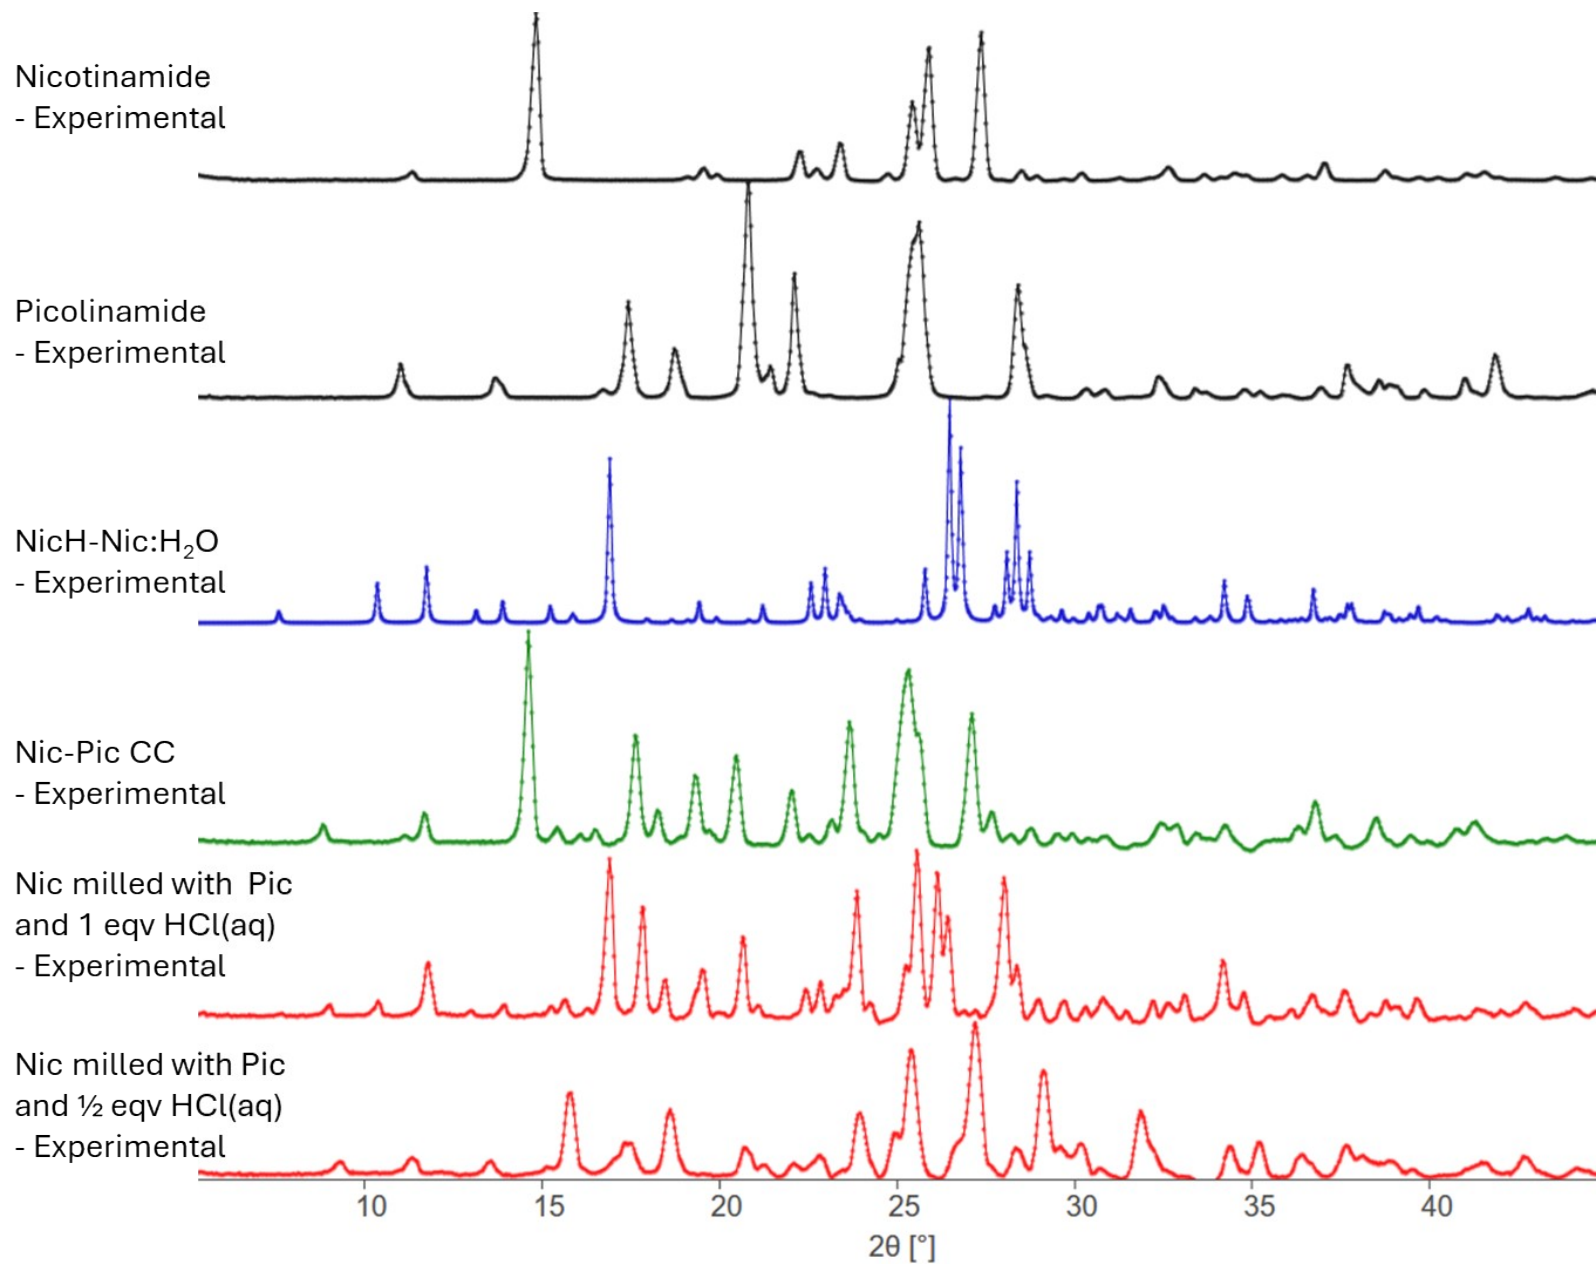

**Fig. S12.** PXRD patterns of **Nic**, **Pic**, **NicH-Nic:H<sub>2</sub>O**, **Nic-Pic**, and competitive milling reactions between **Nic** and **Pic**.

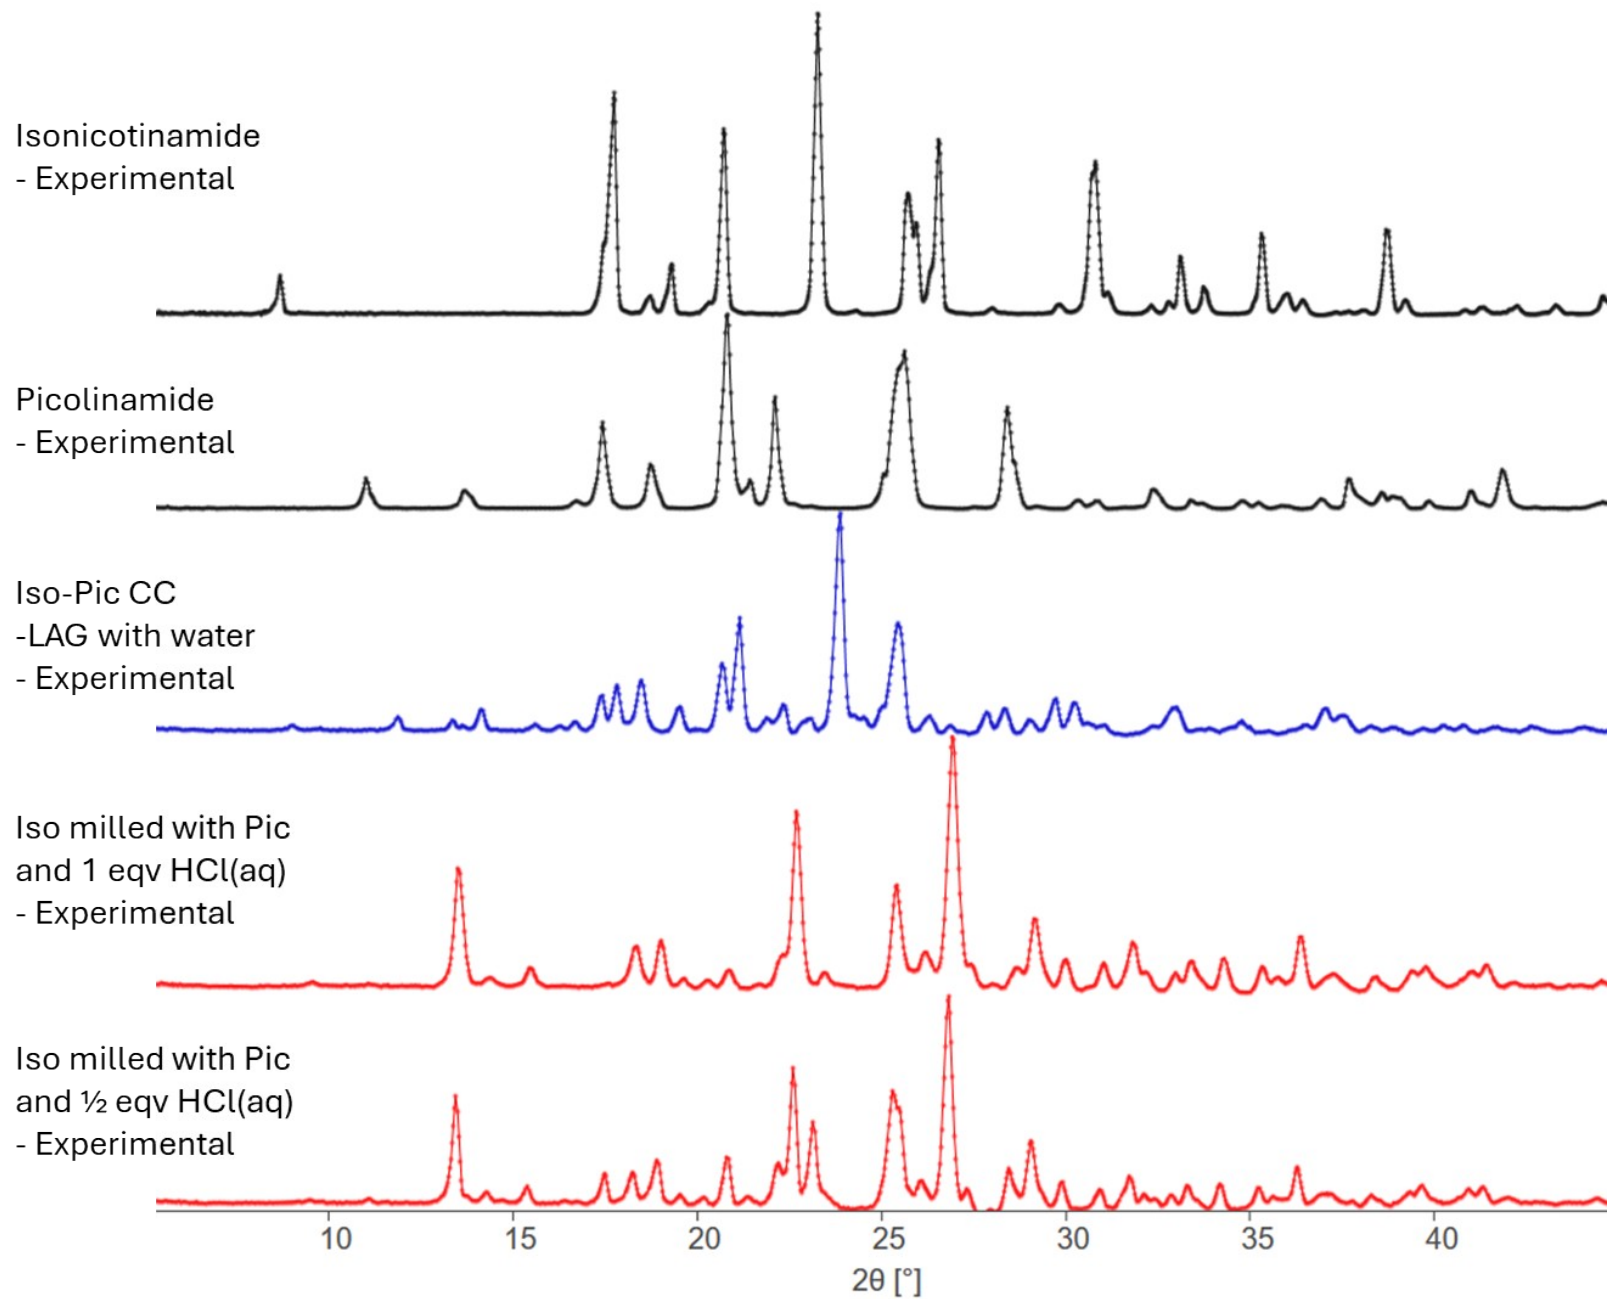

**Fig. S13.** PXRD patterns of **Iso**, **Pic**, **Iso-Pic**, and competitive milling reactions between **Iso** and **Pic**.

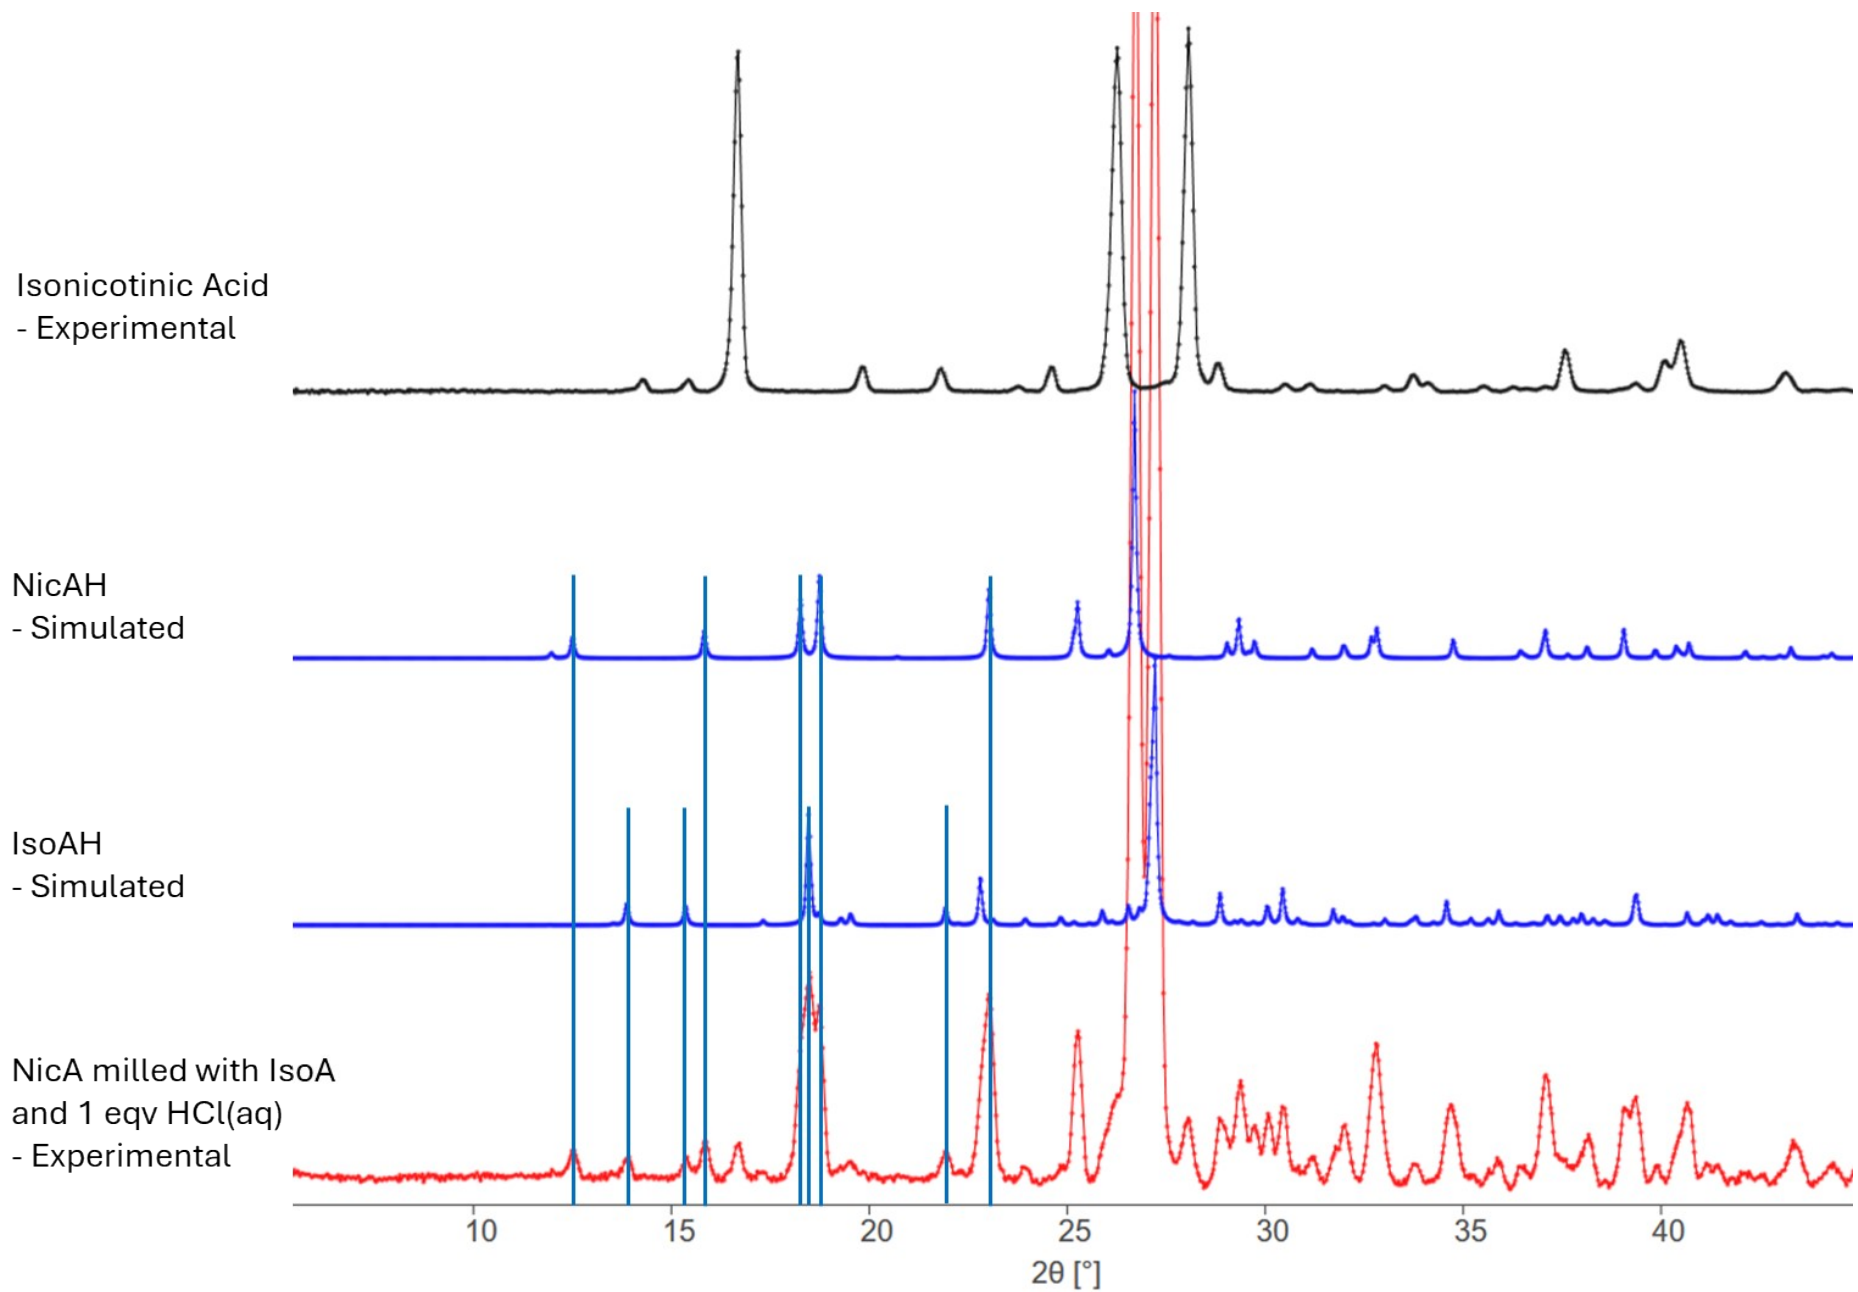

**Fig. S14.** PXRD patterns of **IsoA**, **NicAH**, **IsoAH**, and competitive milling reactions between **IsoA** and **NicA**.

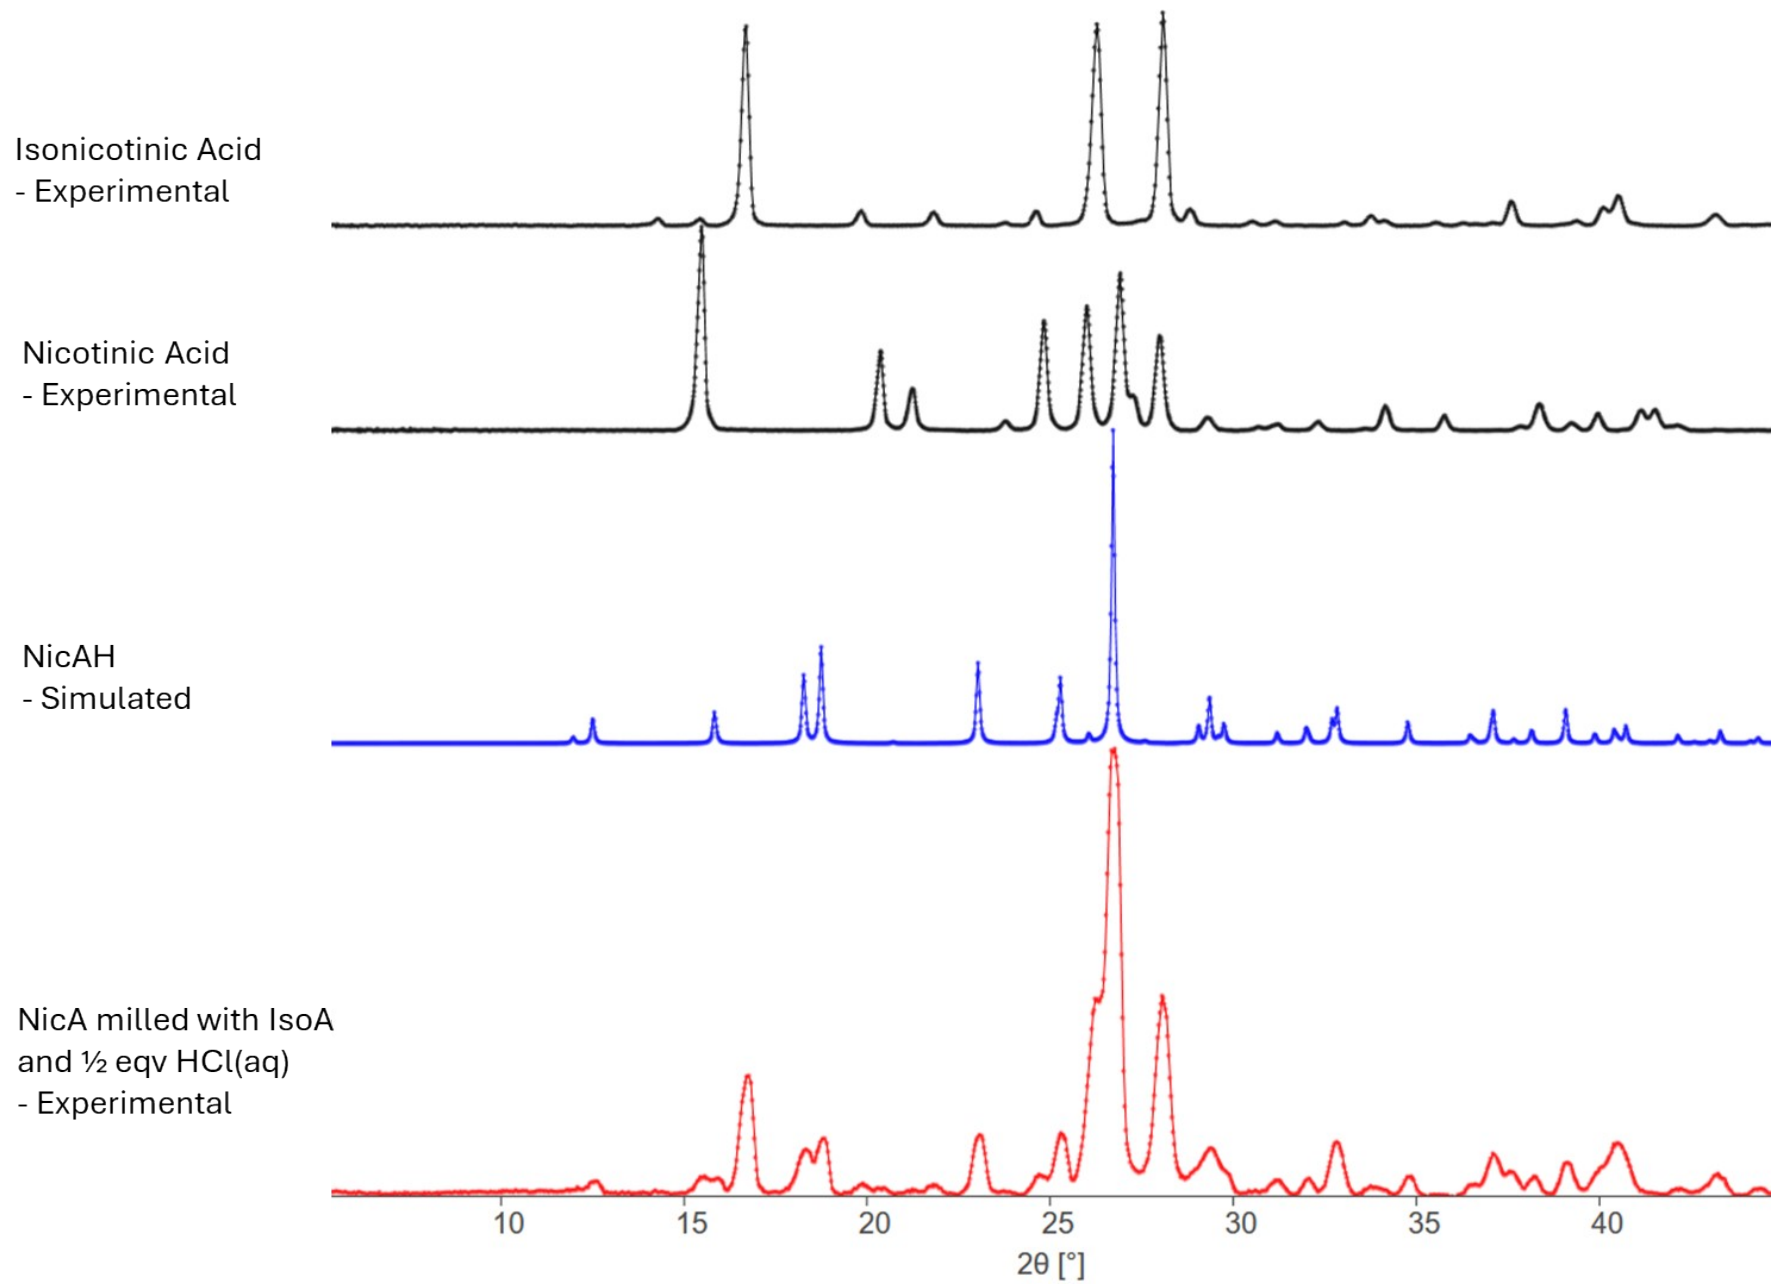

**Fig. S15.** PXRD patterns of **IsoA**, **NicA**, **NicAH**, and competitive milling reactions between **IsoA** and **NicA**.

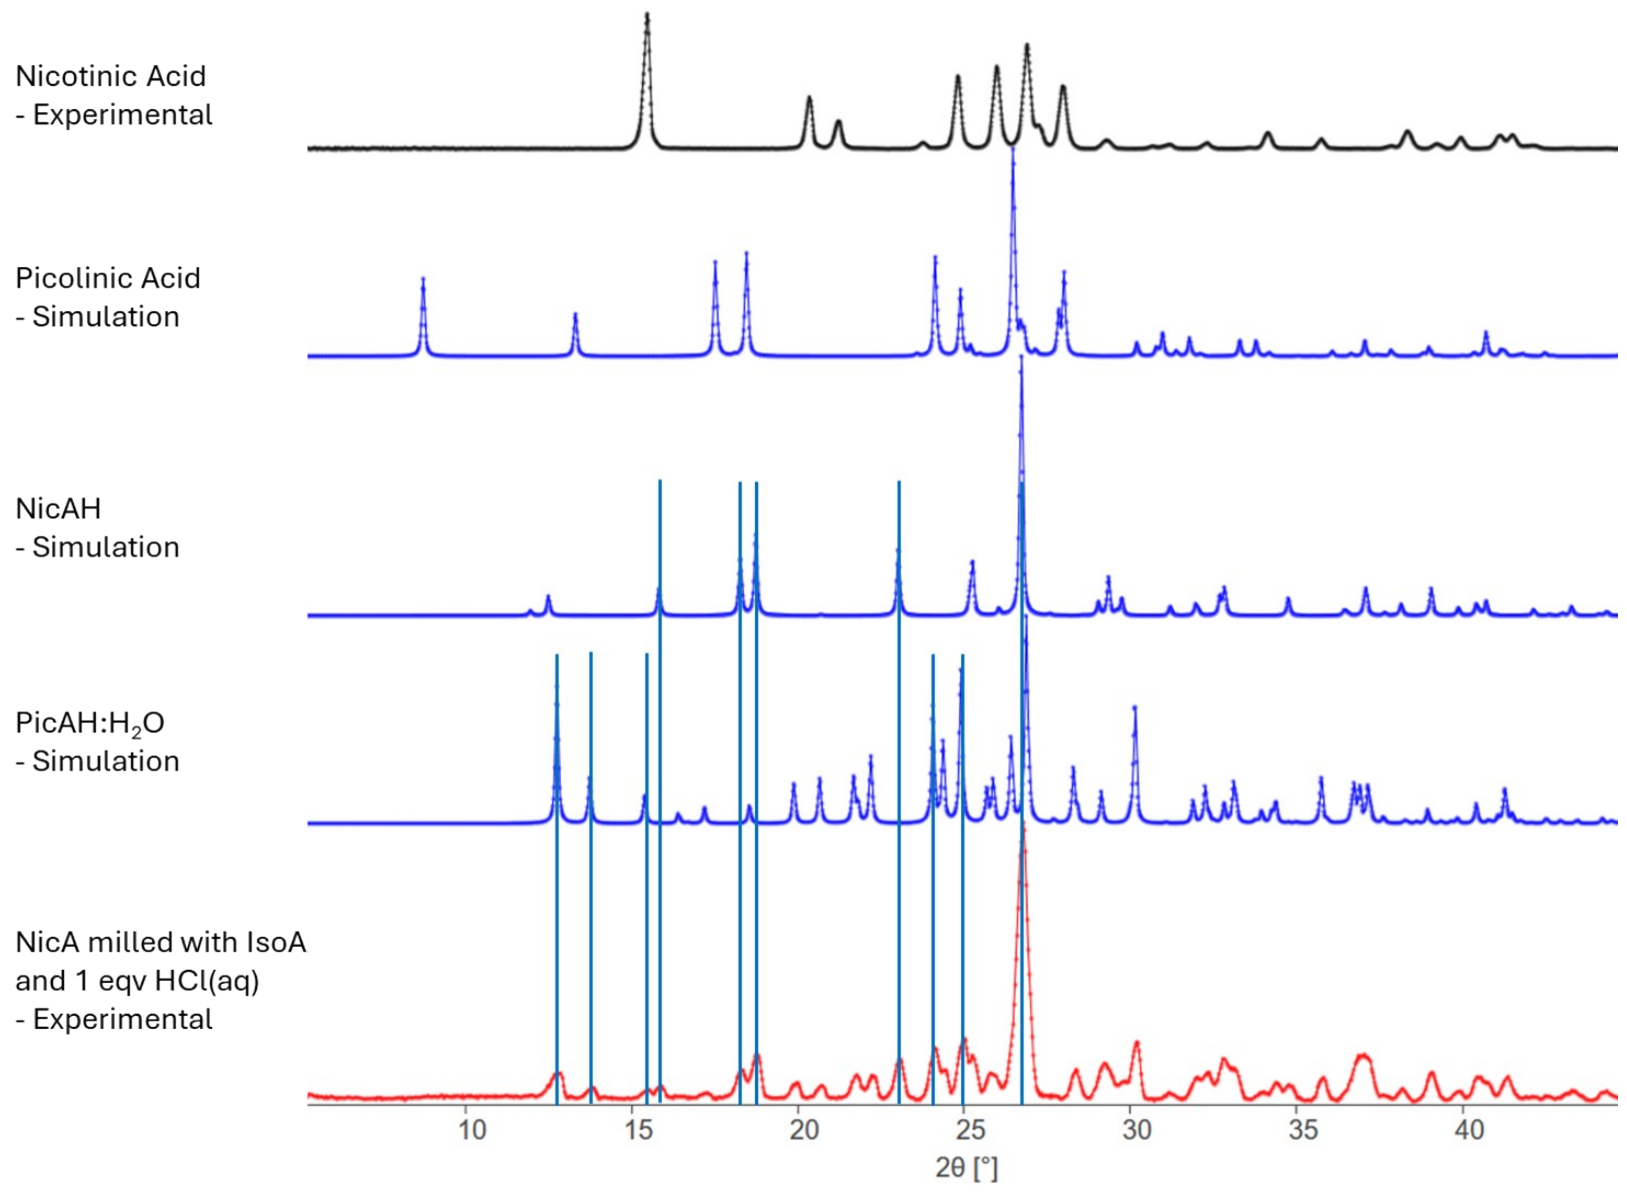

**Fig. S16.** PXRD patterns of **NicA**, **PicA**, **NicAH**, **PicAH:H<sub>2</sub>O** and competitive milling reactions between **PicA** and **NicA**.

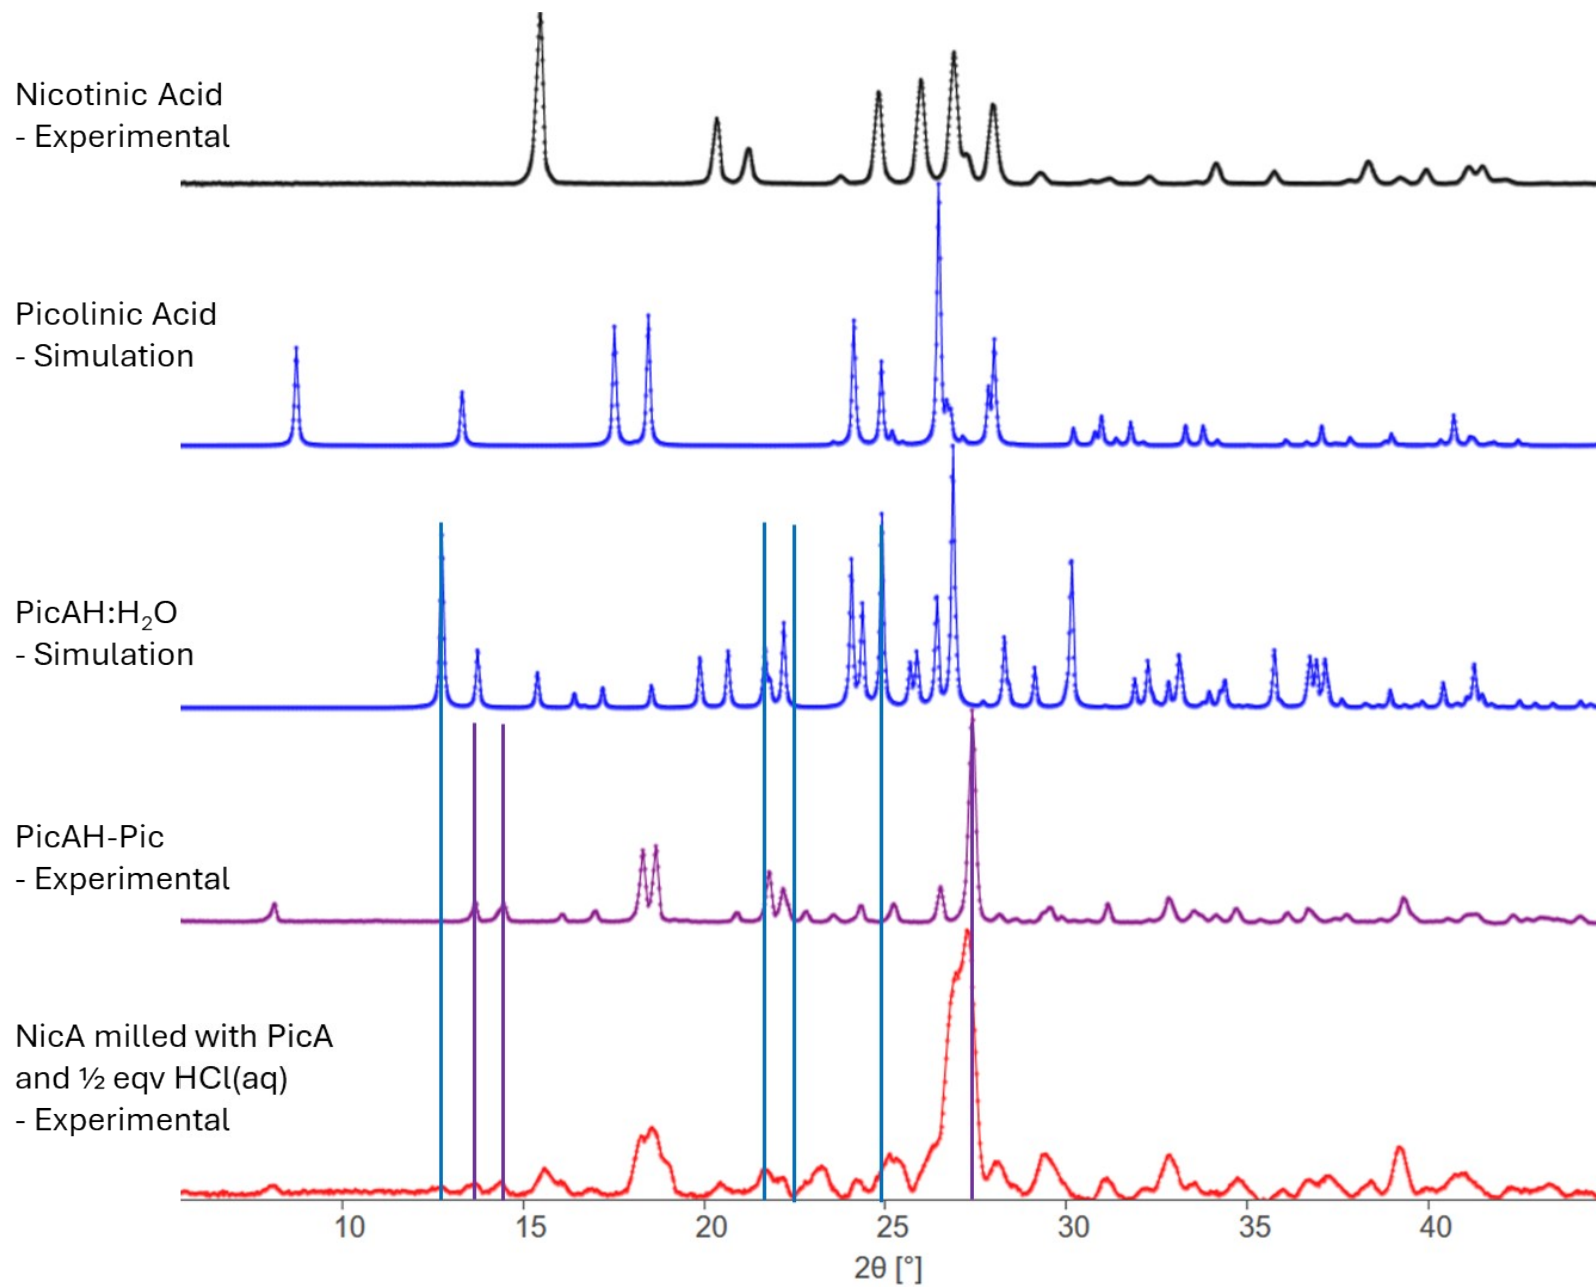

**Fig. S17.** PXRD patterns of NicA, PicA, PicAH:H<sub>2</sub>O, PicAH-Pic and competitive milling reactions between PicA and NicA.

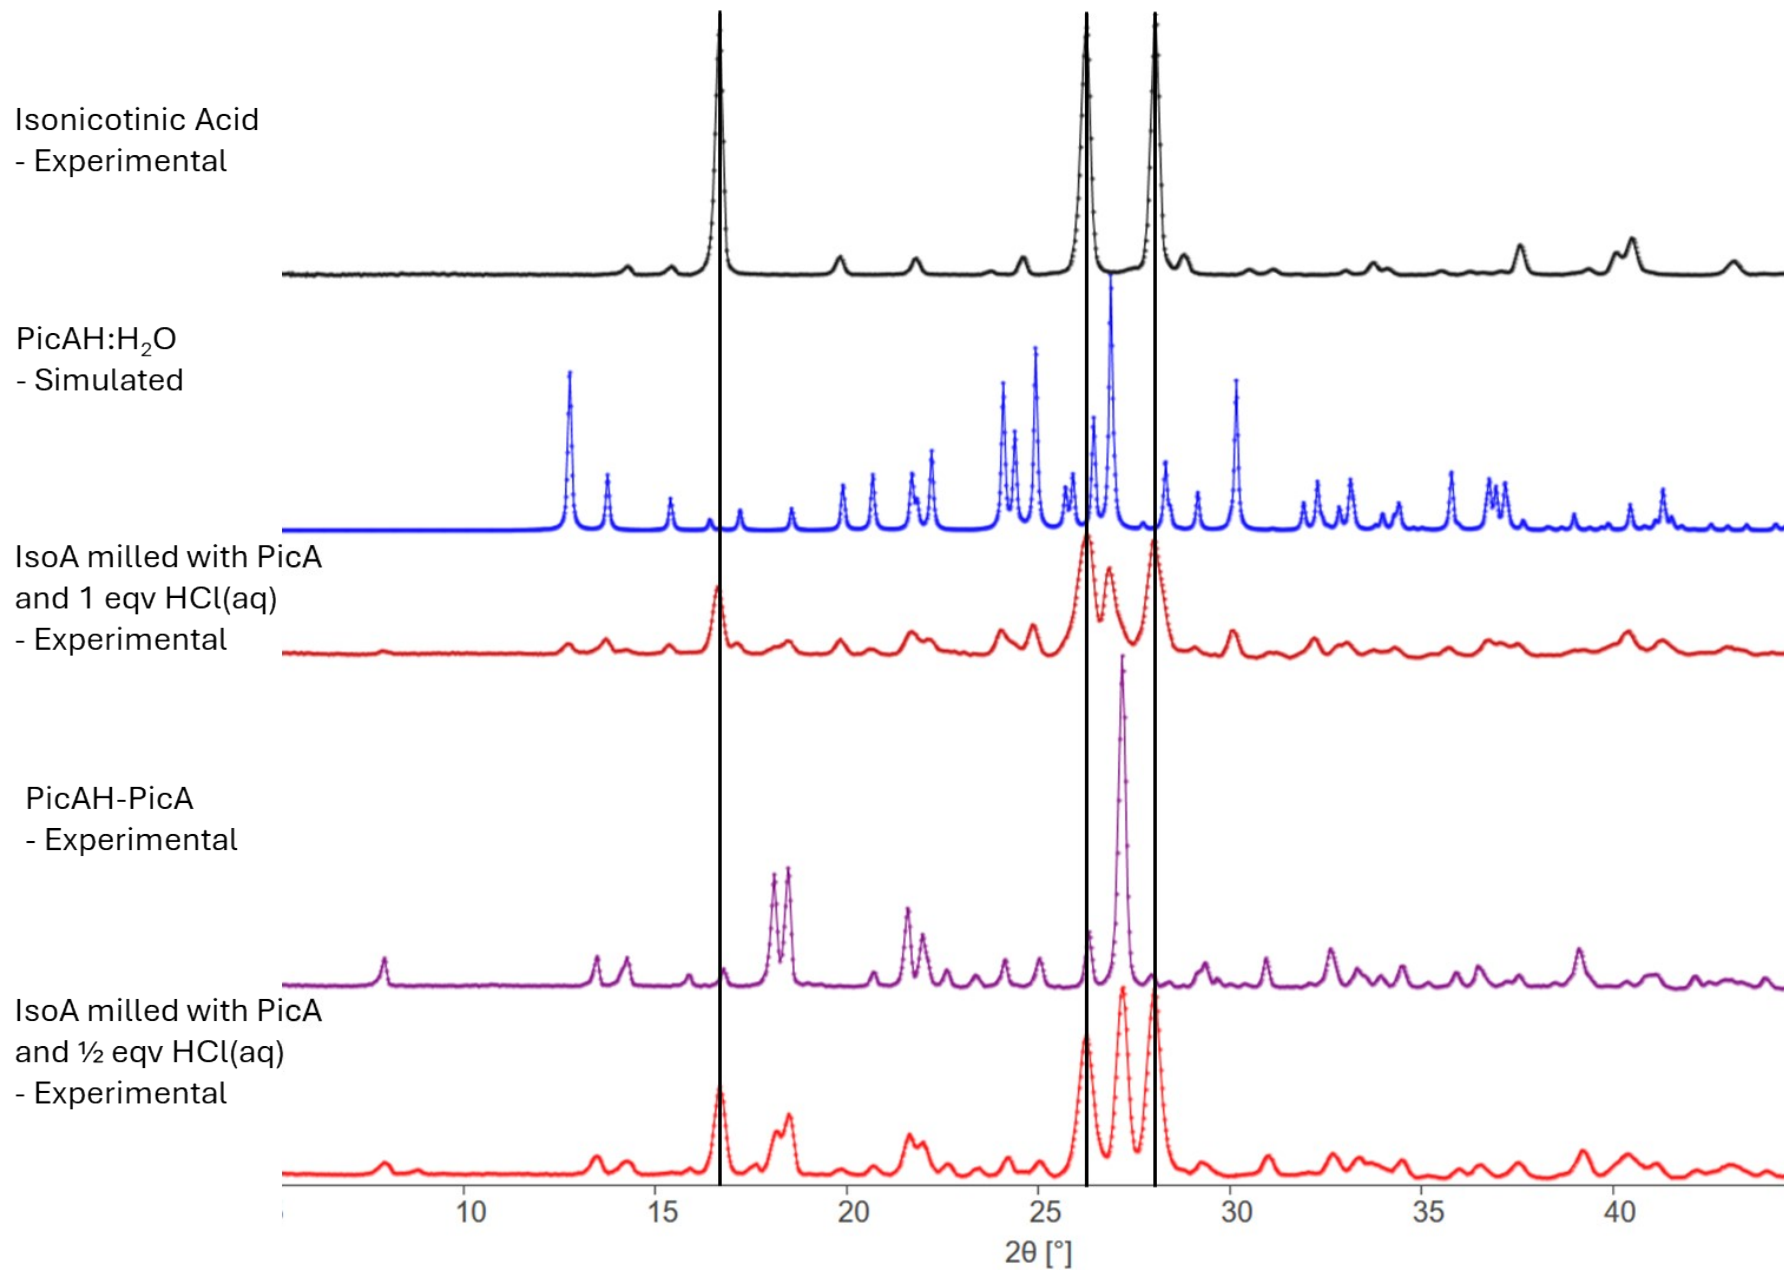

**Fig. S18.** PXRD patterns of **IsoA**, **PicA**, **PicAH:H<sub>2</sub>O**, **PicAH-Pic** and competitive milling reactions between **PicA** and **IsoA**.

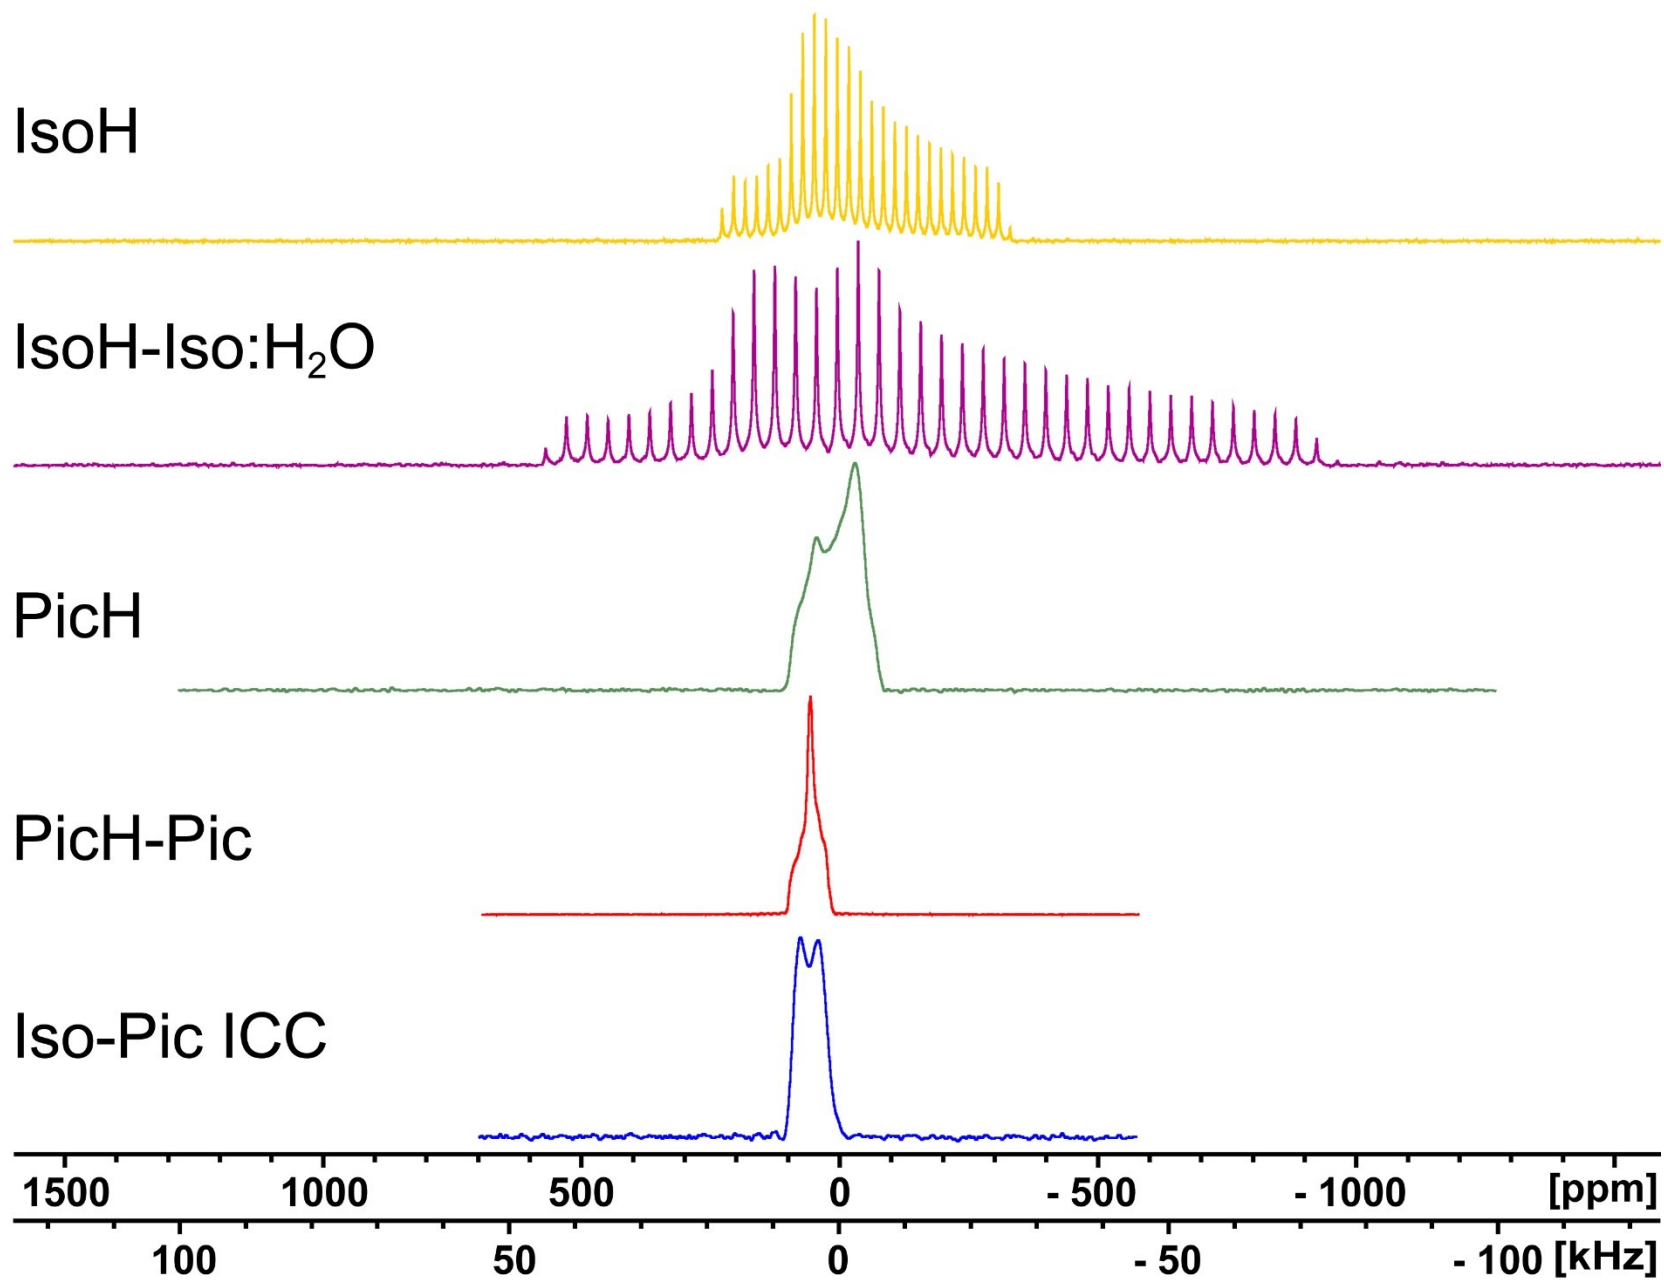

Fig. S19.  $^{35}\text{Cl}$  static SSNMR of IsoH, IsoH-Iso:H<sub>2</sub>O, PicH, PicH-Pic, and Iso-Pic:HCl.

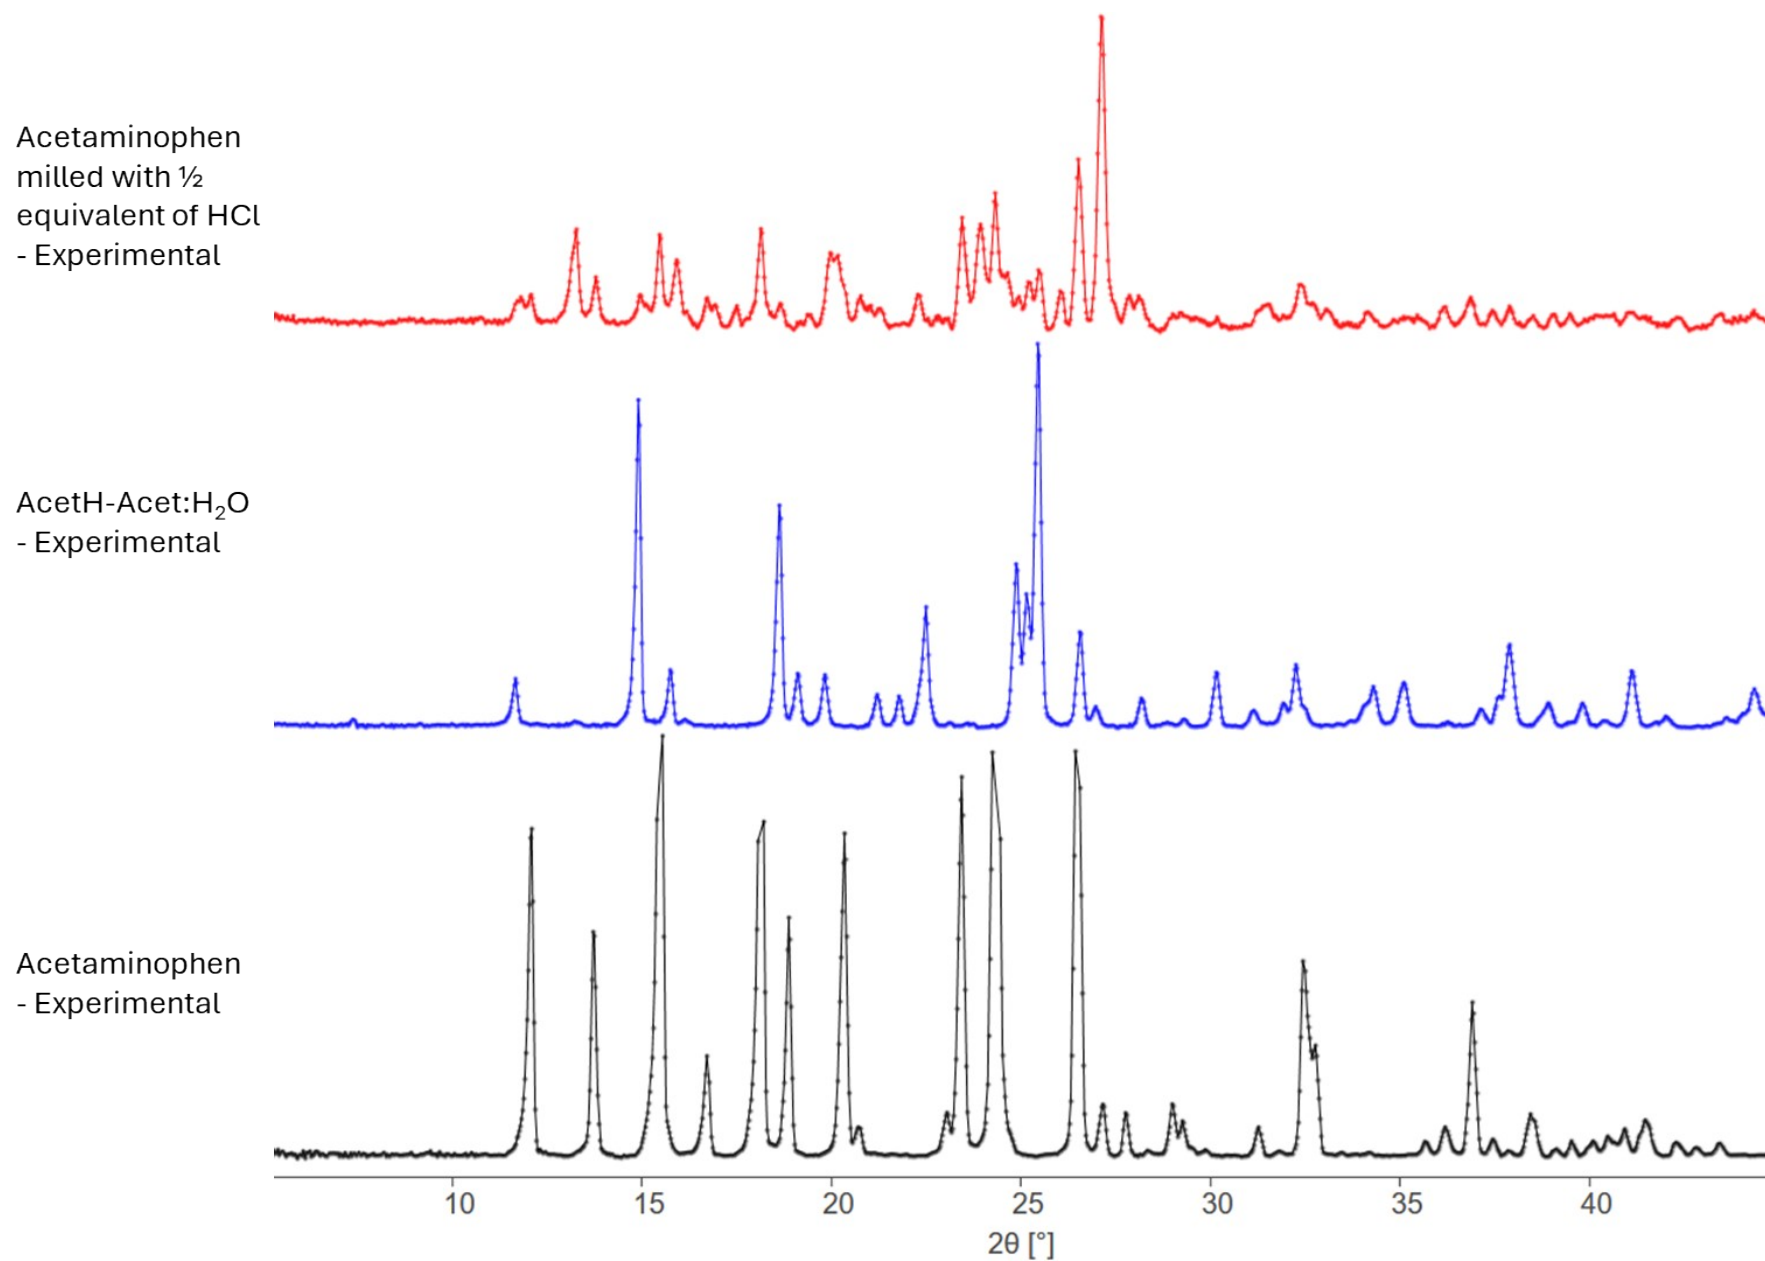

**Fig. S20.** PXRD patterns of AcetH-Acet:H<sub>2</sub>O, Acet, and Acet milled with  $\frac{1}{2}$  equivalent of HCl(aq).

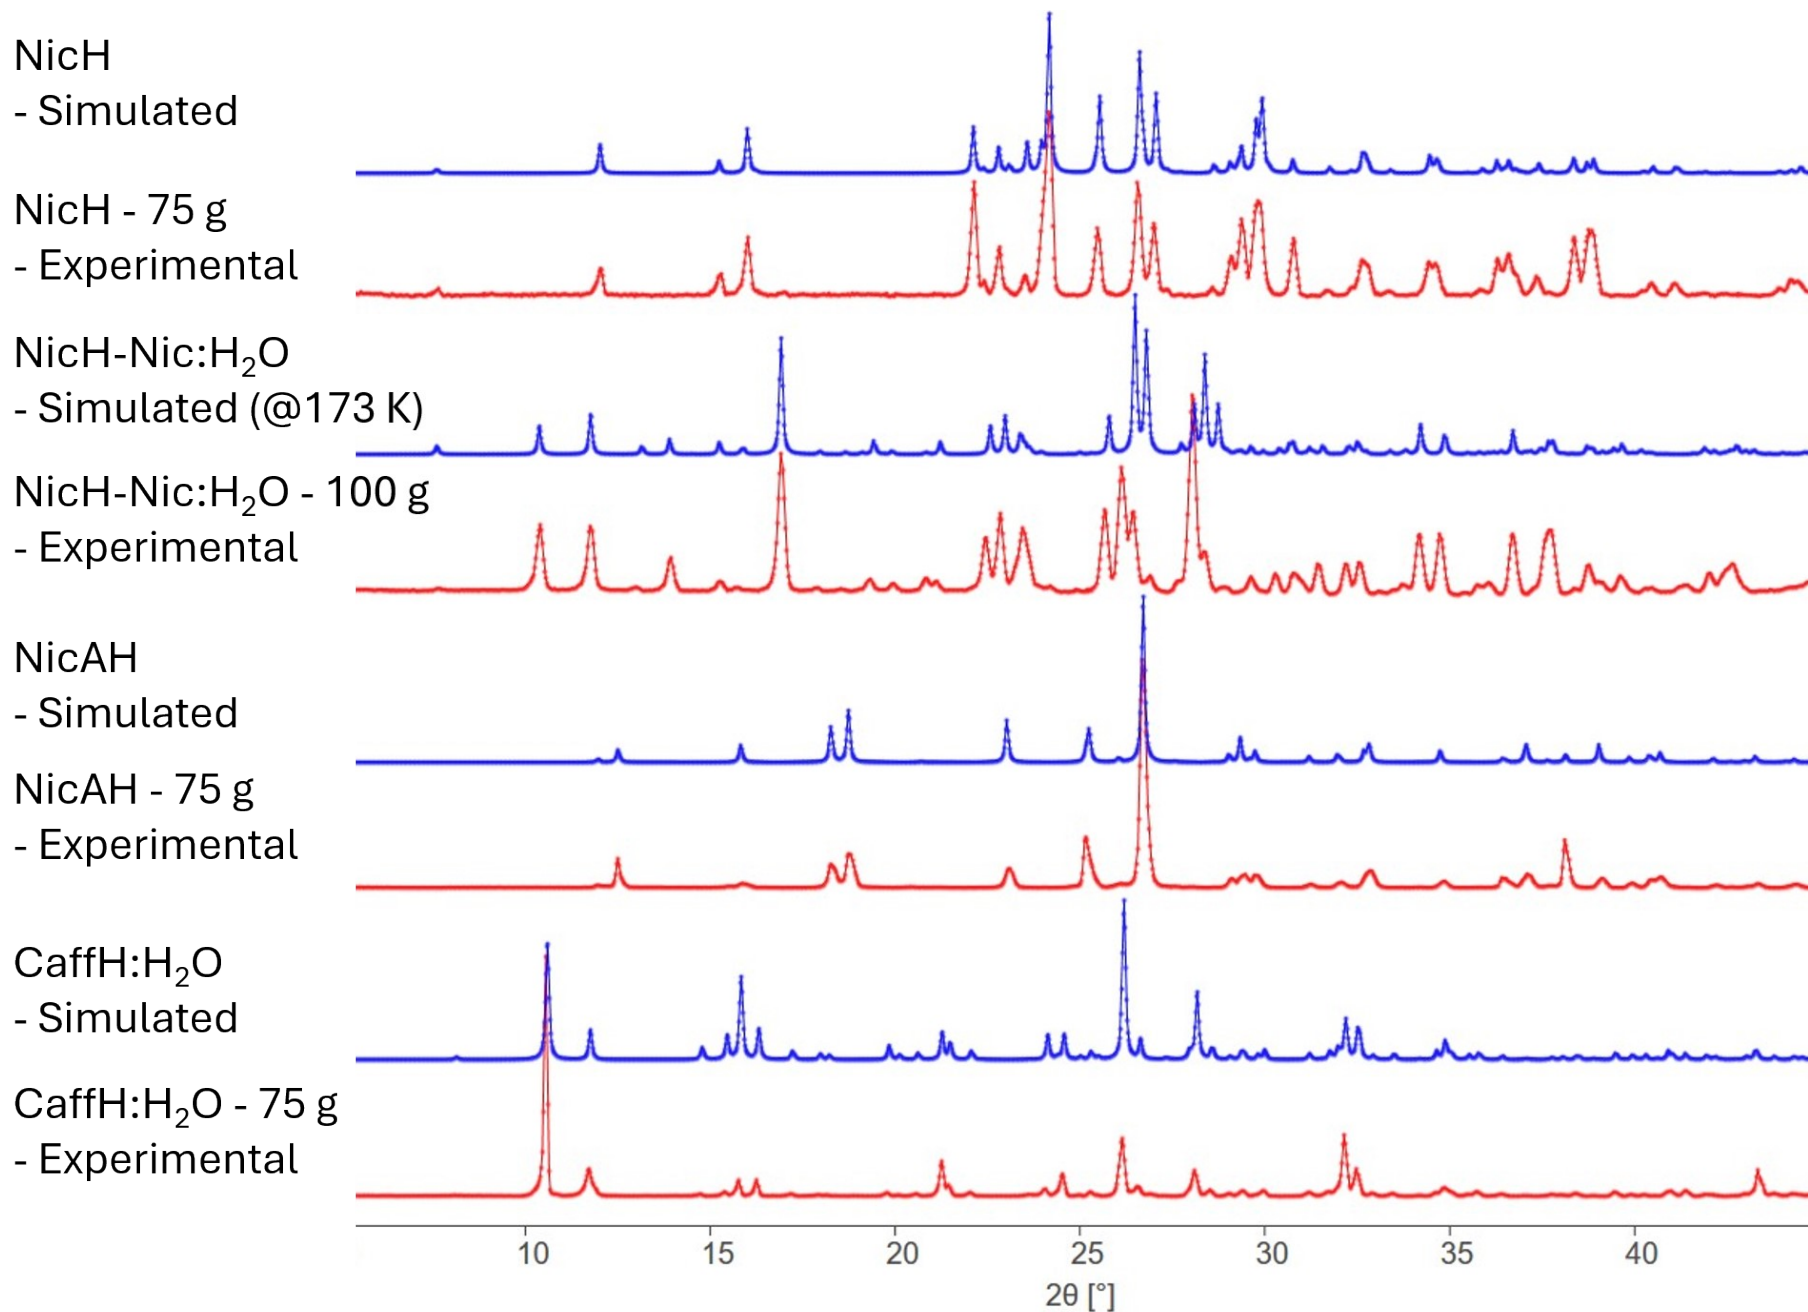

**Fig. S21.** PXRD patterns of scaled up reactions (red) compared to simulated patterns of various HCl salts (blue).

**Table S6.** Summary of results from SCXRD analysis of **PicH:H<sub>2</sub>O**.

---

|                                                              |                                                                                |
|--------------------------------------------------------------|--------------------------------------------------------------------------------|
| Empirical formula                                            | C <sub>6</sub> H <sub>9</sub> ClN <sub>2</sub> O <sub>2</sub>                  |
| Formula weight                                               | 176.60                                                                         |
| Temperature [K]                                              | 299(3)                                                                         |
| Crystal system                                               | monoclinic                                                                     |
| Space group (number)                                         | <i>P</i> 2 <sub>1</sub> / <i>n</i> (14)                                        |
| <i>a</i> [Å]                                                 | 7.33530(10)                                                                    |
| <i>b</i> [Å]                                                 | 8.04600(10)                                                                    |
| <i>c</i> [Å]                                                 | 14.1590(2)                                                                     |
| $\alpha$ [°]                                                 | 90                                                                             |
| $\beta$ [°]                                                  | 96.8950(10)                                                                    |
| $\gamma$ [°]                                                 | 90                                                                             |
| Volume [Å <sup>3</sup> ]                                     | 829.618(19)                                                                    |
| <i>Z</i>                                                     | 4                                                                              |
| $\rho_{\text{calc}}$ [gcm <sup>-3</sup> ]                    | 1.414                                                                          |
| $\mu$ [mm <sup>-1</sup> ]                                    | 3.731                                                                          |
| <i>F</i> (000)                                               | 368                                                                            |
| Crystal size [mm <sup>3</sup> ]                              | 0.21×0.136×0.043                                                               |
| Crystal color                                                | clear whiteish colorless                                                       |
| Crystal shape                                                | irregular                                                                      |
| Radiation                                                    | Cu <i>K</i> <sub><math>\alpha</math></sub> ( $\lambda$ =1.54184 Å)             |
| 2 $\theta$ range [°]                                         | 12.59 to 160.66 (0.78 Å)                                                       |
| Index ranges                                                 | -7 ≤ <i>h</i> ≤ 9<br>-10 ≤ <i>k</i> ≤ 10<br>-18 ≤ <i>l</i> ≤ 18                |
| Reflections collected                                        | 16704                                                                          |
| Independent reflections                                      | 1796<br><i>R</i> <sub>int</sub> = 0.0456<br><i>R</i> <sub>sigma</sub> = 0.0269 |
| Completeness to<br>$\theta = 67.684^\circ$                   | 99.9 %                                                                         |
| Data / Restraints / Parameters                               | 1796/3/106                                                                     |
| Goodness-of-fit on <i>F</i> <sup>2</sup>                     | 1.092                                                                          |
| Final <i>R</i> indexes [ <i>I</i> ≥ 2 $\sigma$ ( <i>I</i> )] | <i>R</i> <sub>1</sub> = 0.0359, w <i>R</i> <sub>2</sub> = 0.1007               |
| Final <i>R</i> indexes [all data]                            | <i>R</i> <sub>1</sub> = 0.0375, w <i>R</i> <sub>2</sub> = 0.1027               |
| Largest peak/hole [eÅ <sup>-3</sup> ]                        | 0.31/-0.28                                                                     |

---

## TGA of IsoH-Iso:H2O

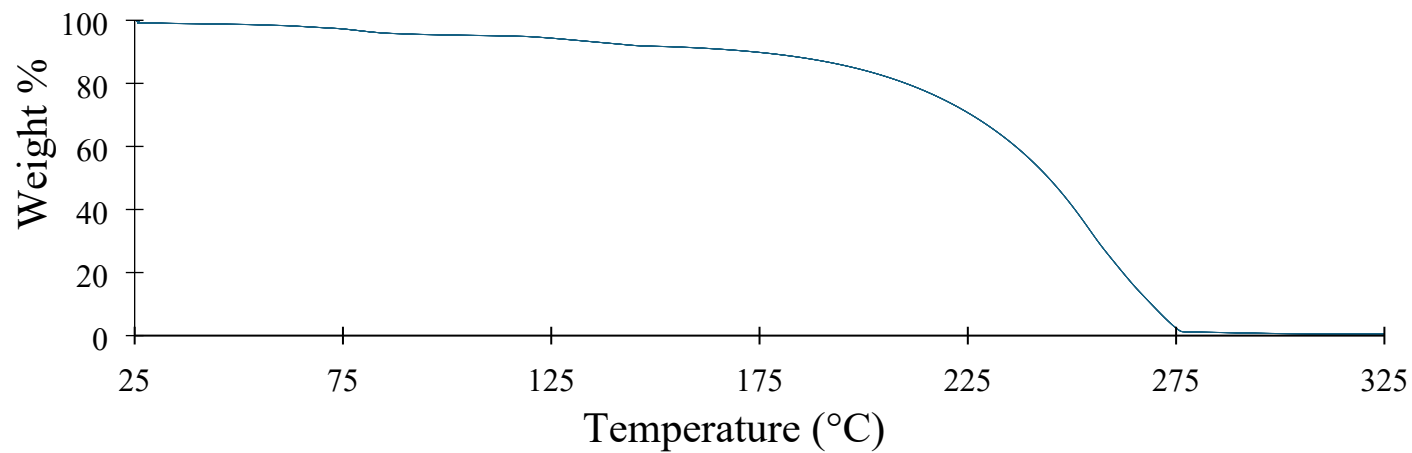

Fig. S22. TGA of IsoH-Iso:H<sub>2</sub>O from 25 to 300 °C.

## TGA of PicH-Pic

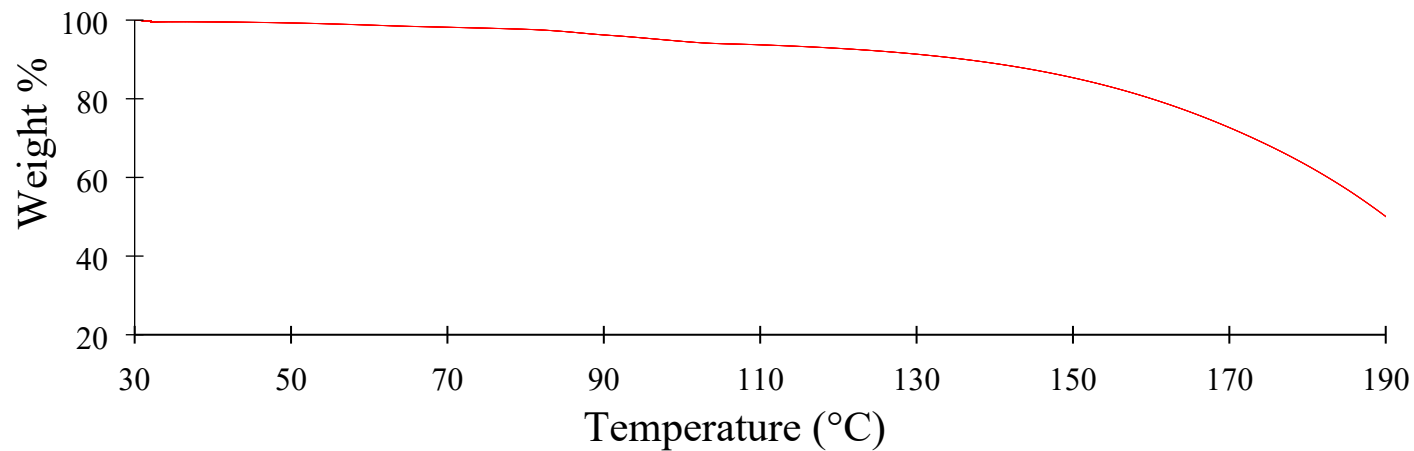

Fig. S23. TGA of PicH-Pic from 30 to 200 °C.

### TGA of PicAH-PicA

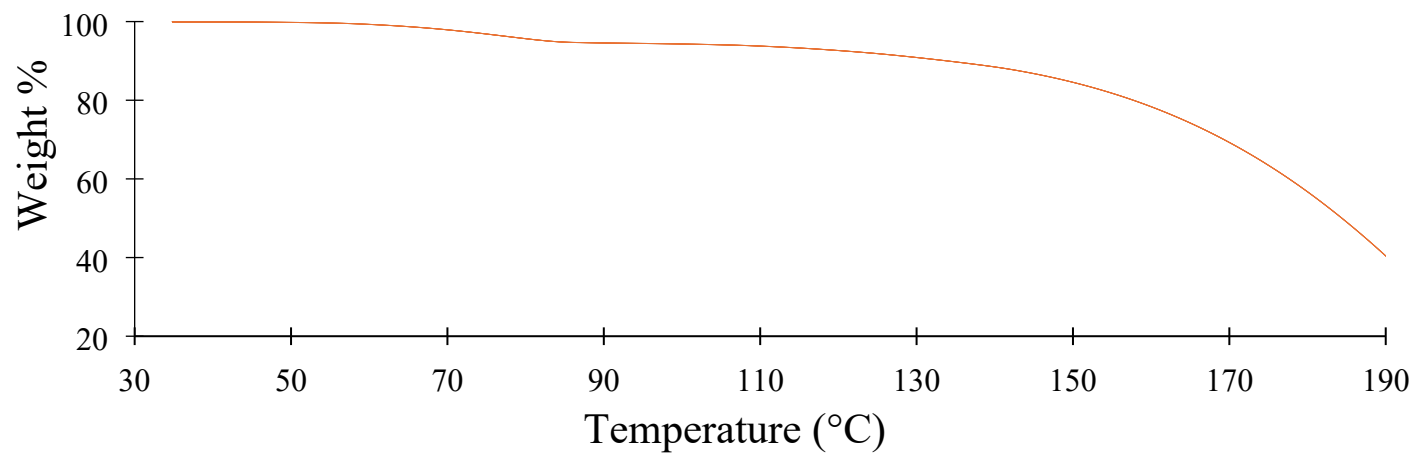

Fig. S24. TGA of PicAH-PicA from 30 to 200 °C.

### TGA of AcetH-Acet:H2O

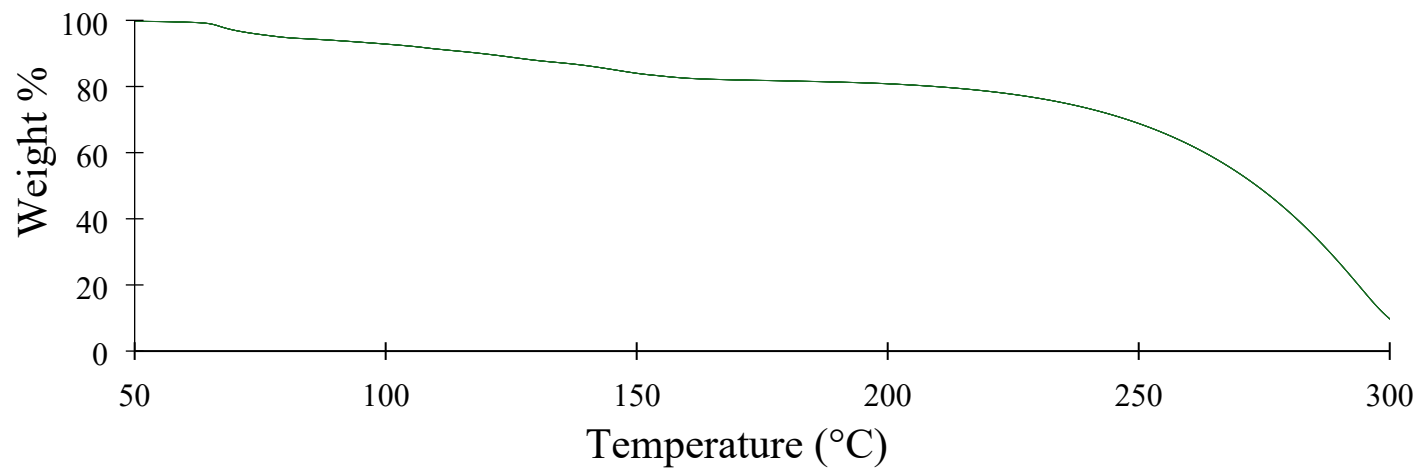

Fig. S25. TGA of AcetH:Acet:H<sub>2</sub>O from 50 to 300 °C.

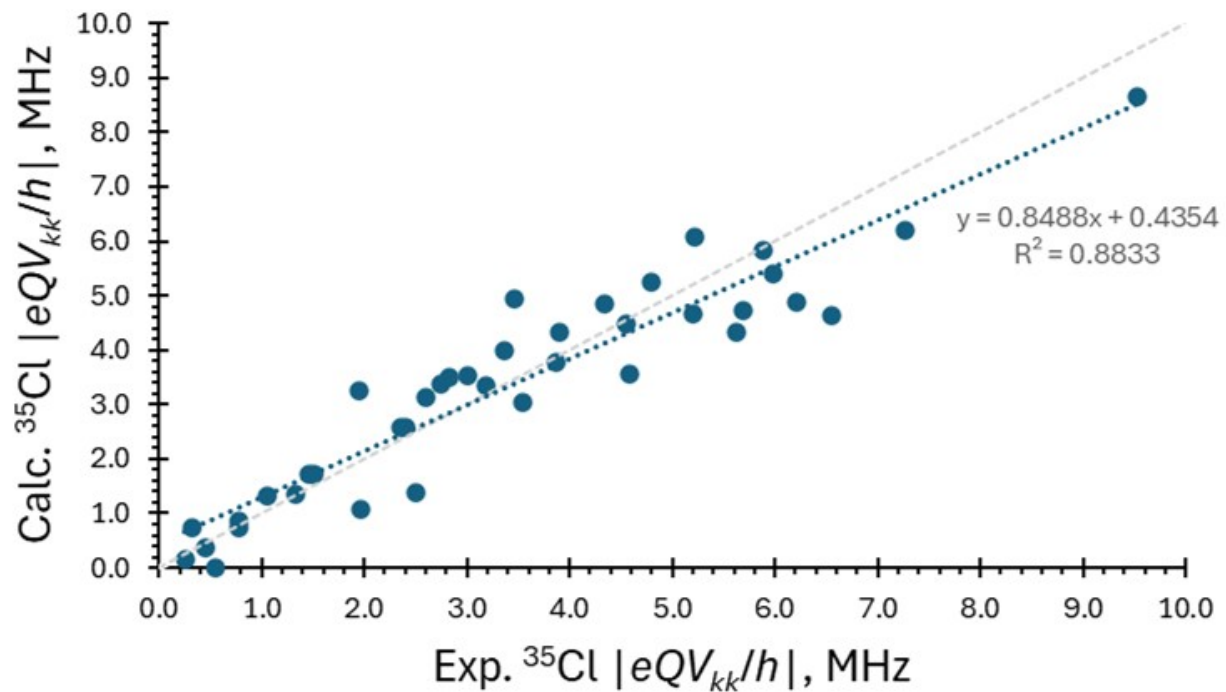

**Fig. S26.** Relationships between principal components of the  $^{35}\text{Cl}$  EFG tensors were measured experimentally and calculated from DFT-D2\* geometry optimized structures. The blue line represents the linear regression fit, while the grey line represents perfect correlation.

**Supplement S1.** The EFG distance and RMS EFG distance are metrics introduced by our laboratory<sup>101</sup> for assessing the agreement between experimental and calculated EFG tensors, and is used in a similar manner to the chemical shift distance and RMS chemical shift difference introduced by Alderman *et al* [*J. Magn. Reson.* **1993**, *101*, 188-197]. We assess the agreement between an experimental ( $V_{kk}^{m,exp}$ ,  $k = 1, 2, 3$ ) and calculated ( $V_{kk}^{m,calc}$ ) EFG tensor at nucleus  $m$  using the EFG distance ( $\Gamma_m$ ) metric. The EFG distance quantifies the degree of similarity between two sets of the principal components of EFG tensors (here, one experimental and one computed set of tensors) using a single scalar value:

$$\Gamma_m = \frac{eQ}{h} \left( \frac{1}{15} [3\Delta_{11}^2 + 3\Delta_{22}^2 + 3\Delta_{33}^2 + 2\Delta_{11}\Delta_{22} + 2\Delta_{11}\Delta_{33} + 2\Delta_{22}\Delta_{33}] \right)^{1/2}$$

$$\Delta_{kk} = \left| |V_{kk}^{m,calc}| - |V_{kk}^{m,exp}| \right|$$

In the above expressions,  $e$  is the elementary charge,  $h$  is Planck's constant, and  $Q$  is the nuclear quadrupole moment [ $Q(^{35}\text{Cl}) = -8.165 \text{ fm}^2$ ]. A root-mean-square EFG distance for an ensemble of  $M$  EFG tensors ( $\Gamma_{RMS}$ ) is determined by the following equation:

$$\Gamma_{RMS} = \left( \frac{1}{M} \sum_m \Gamma_m^2 \right)^{1/2}$$

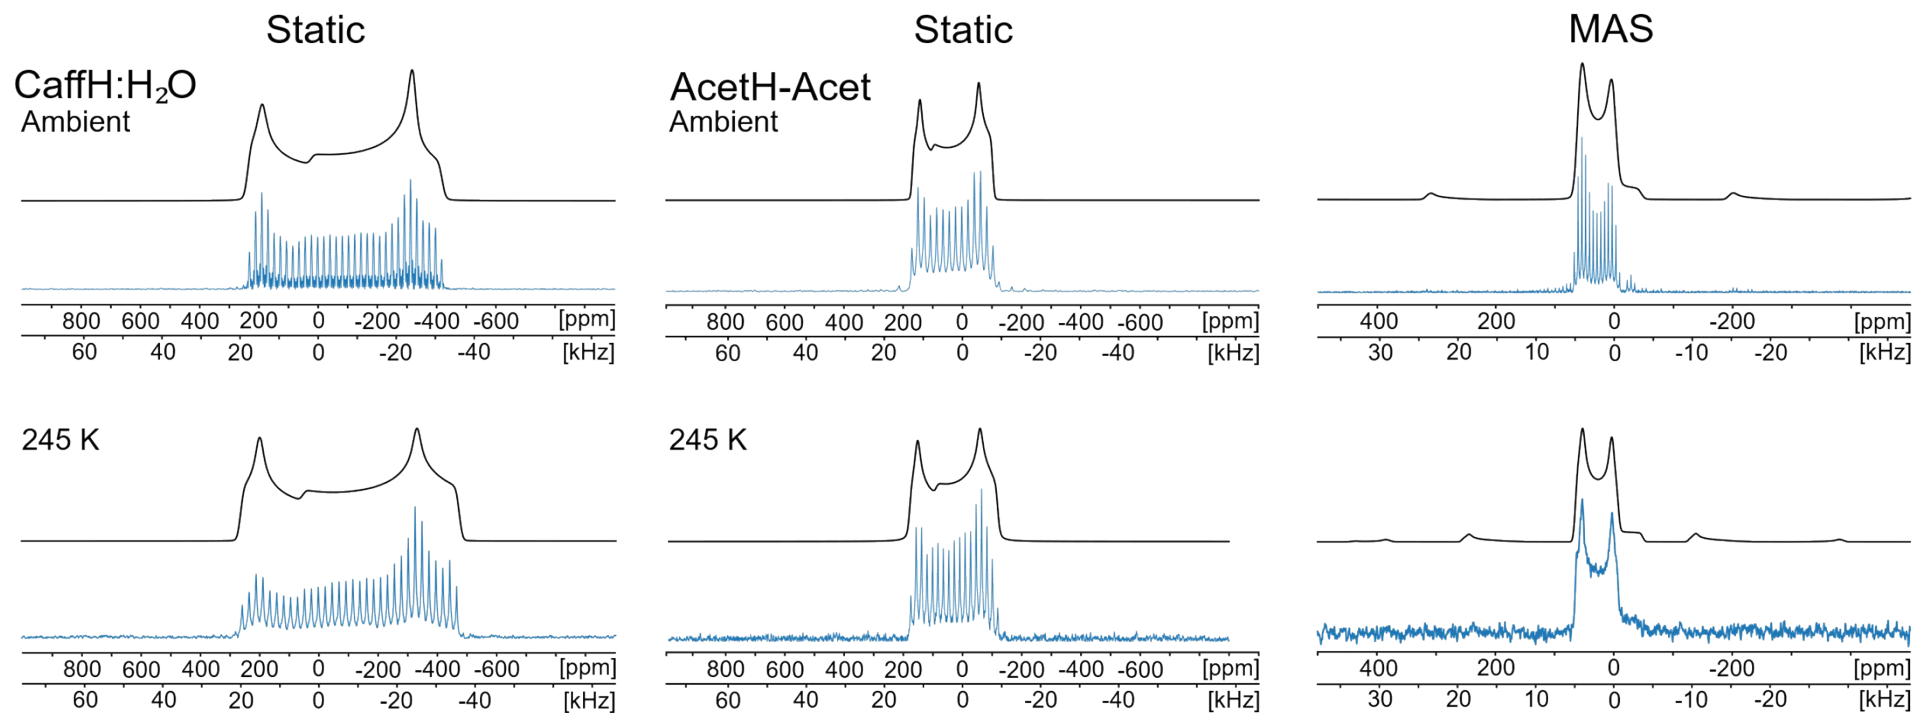

**Fig. S27.** Comparison of  $^{35}\text{Cl}$  SSNMR spectra acquired at 18.8 T under ambient conditions and at 245 K for **CaffH:H<sub>2</sub>O** and **AcetH-Acet**. At For **CaffH:H<sub>2</sub>O** at 245 K:  $C_Q = 5.6$  MHz,  $\eta_Q = 0.16$ ,  $\delta_{\text{iso}} = 11.1$  ppm. For **AcetH-Acet** at 245 K:  $C_Q = 3.51$  MHz,  $\eta_Q = 0.17$ ,  $\delta_{\text{iso}} = 77.2$  ppm.
